# Supplementary material for: Synthesis and preliminary studies of 11C-labeled tetrahydro-1,7-naphthyridine-2-carboxamides for PET imaging of metabotropic glutamate receptor 2
Source: PubMed Central journal article supplement (PMC7532674; doi:10.7150/thno.42587), 2020-09-14

# Supporting Information

## Synthesis and preliminary studies of <sup>11</sup>C-labeled tetrahydro-1,7-naphthyridine-2-carboxamides for PET imaging of metabotropic glutamate receptor 2

Xiaofei Zhang,<sup>1,2,†</sup> Yiding Zhang,<sup>3,†</sup> Zhen Chen,<sup>1</sup> Tuo Shao,<sup>1</sup> Richard Van,<sup>4</sup> Katsushi Kumata,<sup>3</sup> Xiaoyun Deng,<sup>1</sup> Hualong Fu,<sup>1</sup> Tomoteru Yamasaki,<sup>3</sup> Jian Rong,<sup>1</sup> Kuan Hu,<sup>3</sup> Akiko Hatori,<sup>3</sup> Lin Xie,<sup>3</sup> Qingzhen Yu,<sup>1</sup> Weijian Ye,<sup>5</sup> Hao Xu,<sup>5</sup> Douglas J. Sheffler,<sup>6</sup> Nicholas D. P. Cosford,<sup>6</sup> Yihan Shao,<sup>4</sup> Pingping Tang,<sup>2</sup> Lu Wang,<sup>1,5,\*</sup> Ming-Rong Zhang,<sup>3,\*</sup> Steven H. Liang<sup>1,\*</sup>

<sup>1</sup>Division of Nuclear Medicine and Molecular Imaging, Massachusetts General Hospital & Department of Radiology, Harvard Medical School, Boston, MA, 02114, USA

<sup>2</sup>State Key Laboratory and Institute of Elemento-Organic Chemistry, Collaborative Innovation Center of Chemical Science and Engineering, Nankai University, Tianjin 300071, China

<sup>3</sup>Department of Radiopharmaceuticals Development, National Institute of Radiological Sciences, National Institutes for Quantum and Radiological Science and Technology, 4-9-1 Anagawa, Inage-ku, Chiba 263-8555, Japan

<sup>4</sup>Department of Chemistry and Biochemistry, University of Oklahoma, Norman, Oklahoma 73019, United States

<sup>5</sup>Department of Nuclear Medicine and PET/CT-MRI Center, The First Affiliated Hospital of Jinan University, 613 West Huangpu Road, Tianhe District, Guangzhou 510630, China

<sup>6</sup>Cancer Metabolism and Signaling Networks Program and Conrad Prebys Center for Chemical Genomics, Sanford-Burnham Prebys Medical Discovery Institute, La Jolla, California 92037, United States

\*Corresponding authors.

[liang.steven@mgh.harvard.edu](mailto:liang.steven@mgh.harvard.edu) (S. H. Liang); [zhang.ming-rong@qst.go.jp](mailto:zhang.ming-rong@qst.go.jp) (M.-R. Zhang);

[l\\_wang1009@foxmail.com](mailto:l_wang1009@foxmail.com) (L. Wang)

†These two authors contributed equally to this work.

## Contents

|                                                                                                                                                                          |    |
|--------------------------------------------------------------------------------------------------------------------------------------------------------------------------|----|
| <b>Figure S1.</b> Concentration-response curves of mGlu <sub>2</sub> NAMs compounds <b>14</b> in mGlu <sub>2</sub> GIRK or mGlu <sub>3</sub> GIRK functional assays..... | 1  |
| <b>Figure S2.</b> Time-activity curves of [ <sup>11</sup> C] <b>14a</b> in rat brains.....                                                                               | 2  |
| <b>Figure S3.</b> Radiometabolite analysis of [ <sup>11</sup> C] <b>14a</b> in rat brain and plasma.....                                                                 | 3  |
| <b>Table S1.</b> Radiometabolite and parent (unchanged) fraction of [ <sup>11</sup> C] <b>14a</b> in rat brain and plasma .....                                          | 3  |
| <b>Figure S4.</b> RadioHPLC chromatogram in the brain and plasma 5 min post injection of [ <sup>11</sup> C] <b>14a</b> .....                                             | 4  |
| <b>Figure S5.</b> RadioHPLC chromatogram in the brain and plasma 20 min post injection of [ <sup>11</sup> C] <b>14a</b> ..                                               | 4  |
| <b>Figure S6.</b> Radiometabolite analysis of [ <sup>11</sup> C] <b>14b</b> in rat brain and plasma.....                                                                 | 5  |
| <b>Table S2.</b> Radiometabolite and parent (unchanged) fraction of [ <sup>11</sup> C] <b>14b</b> in rat brain and plasma .....                                          | 5  |
| <b>Figure S7.</b> RadioHPLC chromatogram in the brain and plasma 5 min post injection of [ <sup>11</sup> C] <b>14b</b> .....                                             | 5  |
| <b>Figure S8.</b> RadioHPLC chromatogram in the brain and plasma 20 min post injection of [ <sup>11</sup> C] <b>14b</b> ....                                             | 6  |
| <b>Figure S9.</b> Image of the ROIs used for quantification of in vitro autoradiography.....                                                                             | 7  |
| <b>Figure S10.</b> Functional (agonist and antagonist) assays of compound <b>14b</b> towards mGlu receptors.....                                                         | 7  |
| <b>Figure S11.</b> Off-target pharmacological evaluation of compound <b>14b</b> at a concentration of 10 μM against major CNS targets.....                               | 8  |
| <b>Figure S12.</b> Representative PET/MRI fused images.....                                                                                                              | 9  |
| NMR spectra of synthesized compounds.....                                                                                                                                | 10 |

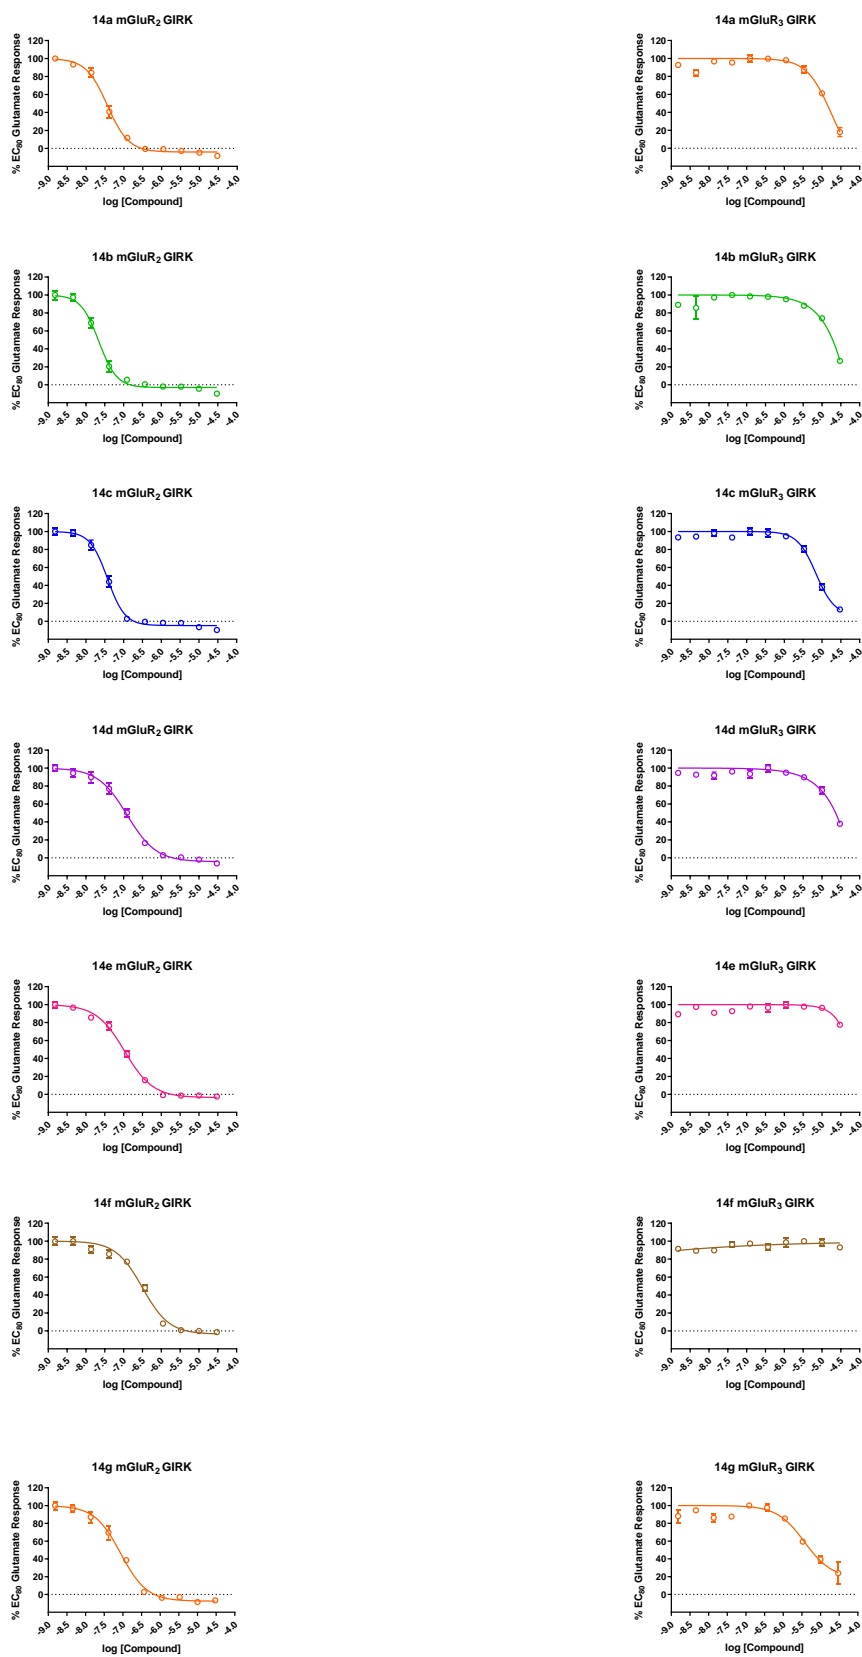

**Figure S1.** Concentration–response curves of mGlu<sub>2</sub> NAMs compounds **14a-14g** in mGlu<sub>2</sub> GIRK or mGlu<sub>3</sub> GIRK functional assays.

A. Baseline studies of [<sup>11</sup>C]14a

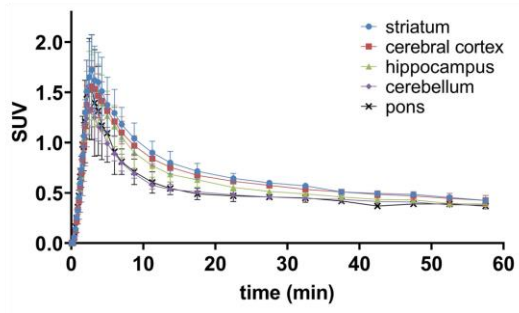

B. Baseline studies with pretreatment of 14a

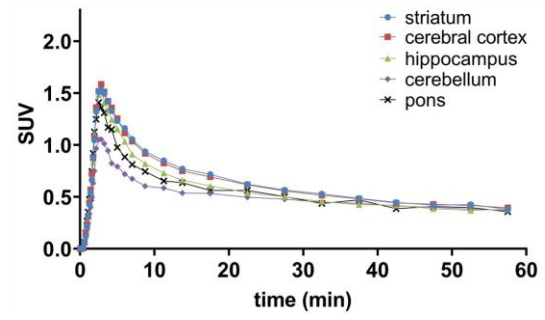

**Figure S2.** Time-activity curves of [<sup>11</sup>C]14a in rat brains. “Blocking conditions: 14a (1 mg/kg), 30 min *i.v.* before radioligand injection.

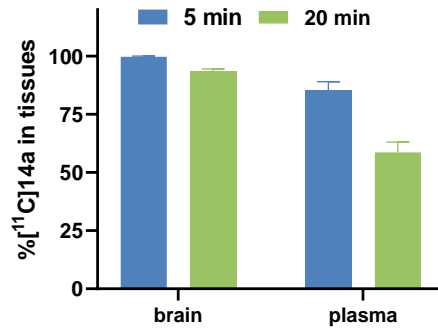

**Figure S3.** Radiometabolite analysis of [<sup>11</sup>C]14a in rat brain (average two runs)

**Table S1.** Radiometabolite and parent (unchanged) fraction of [<sup>11</sup>C]14a in rat brain and plasma

|                  | Metabolite (%) | Unchanged (%) |
|------------------|----------------|---------------|
| Plasma 5 mins-1  | 11.96          | 88.04         |
| Plasma 5 mins-2  | 17.06          | 82.94         |
| Plasma 20 mins-1 | 44.51          | 55.49         |
| Plasma 20 mins-2 | 38.26          | 61.74         |
| Brain 5 mins-1   | 0.06           | 99.94         |
| Brain 5 mins-2   | 0.49           | 99.51         |
| Brain 20 mins-1  | 7.3            | 92.7          |
| Brain 20 mins-2  | 5.76           | 94.24         |

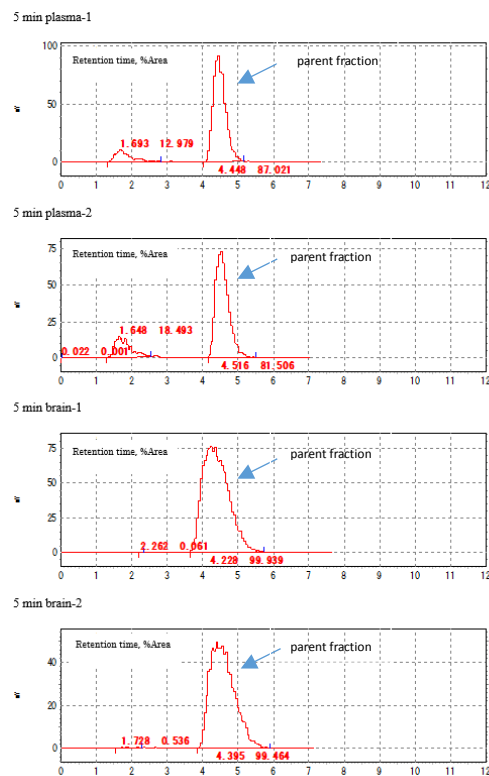

**Figure S4.** RadioHPLC chromatogram in the brain and plasma 5 min post injection of [<sup>11</sup>C]14a

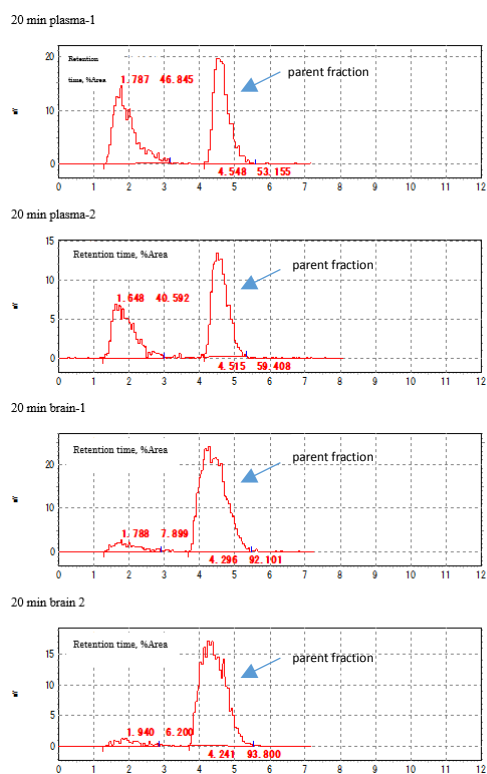

**Figure S5.** RadioHPLC chromatogram in the brain and plasma 20 min post injection of  $[^{11}\text{C}]\mathbf{14a}$

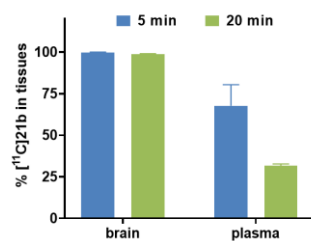

**Figure S6.** Radiometabolite analysis of  $[^{11}\text{C}]\mathbf{14b}$  in rat brain (average two runs)

**Table S2.** Radiometabolite and parent (unchanged) fraction of  $[^{11}\text{C}]\mathbf{14b}$  in rat brain and plasma

|                  | Metabolite(%) | Unchanged (%) |
|------------------|---------------|---------------|
| Plasma 5 mins-1  | 21.32         | 76.68         |
| Plasma 5 mins-2  | 41.31         | 58.69         |
| Plasma 20 mins-1 | 69.22         | 30.78         |
| Plasma 20 mins-2 | 67.60         | 32.40         |
| Brain 5 mins-1   | 0.28          | 99.72         |
| Brain 5 mins-2   | 0.04          | 99.96         |
| Brain 20 mins-1  | 0.97          | 99.03         |
| Brain 20 mins-2  | 1.22          | 98.78         |

5 min plasma-1

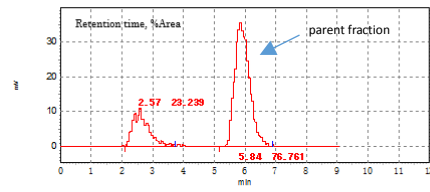

5 min plasma-2

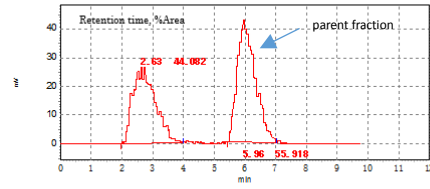

5 min brain-1

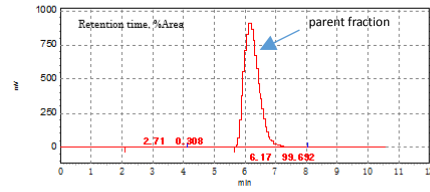

5 min brain-2

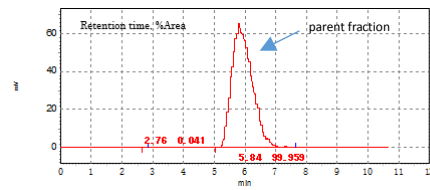

Figure S7. RadioHPLC chromatogram in the brain and plasma 5 min post injection of [ $^{11}\text{C}$ ]14b

20 min plasma-1

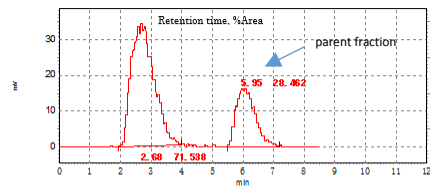

20 min plasma-2

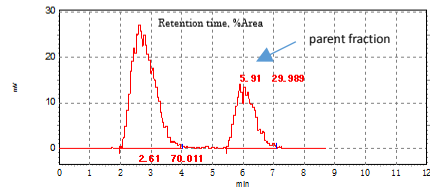

20 min brain-1

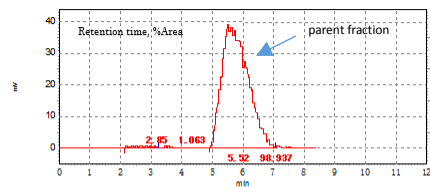

20 min brain 2

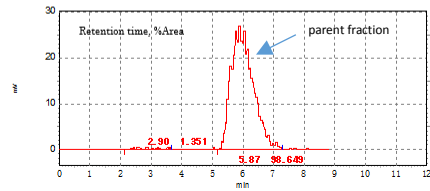

Figure S8. RadioHPLC chromatogram in the brain and plasma 20 min post injection of [<sup>11</sup>C]14b



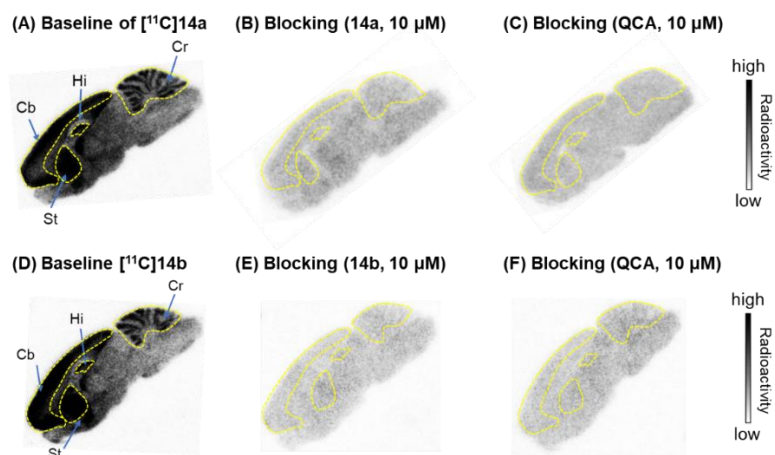

**Figure S9.** Image of the ROIs used for quantification of in vitro autoradiography. (A) Brain sections were treated with [<sup>11</sup>C]**14a**; (B) Brain sections were pre-treated with **14a** (10 μM), followed by [<sup>11</sup>C]**14a**; (C) Brain sections were pre-treated with **QCA** (10 μM), followed by [<sup>11</sup>C]**14a**; (A) Brain sections were treated with [<sup>11</sup>C]**14b**; (B) Brain sections were pre-treated with **14b** (10 μM), followed by [<sup>11</sup>C]**14b**; (C) Brain sections were pre-treated with **QCA** (10 μM), followed by [<sup>11</sup>C]**14b**.

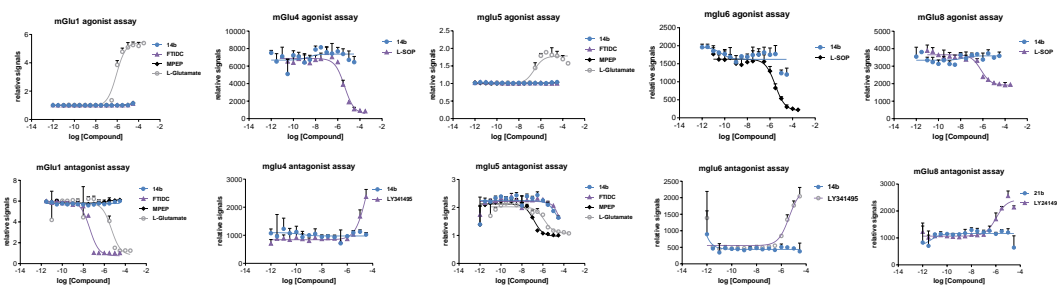

**Figure S10.** Functional (agonist and antagonist) assays of compound **14b** towards mGlu receptors, including mGlu<sub>1</sub>, mGlu<sub>4</sub>, mGlu<sub>5</sub>, mGlu<sub>6</sub> and mGlu<sub>8</sub>.

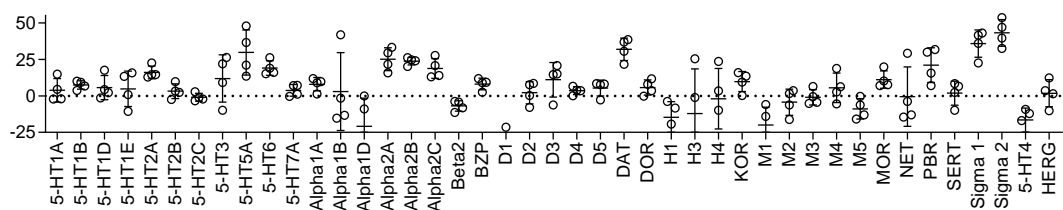

**Figure S11.** Off-target pharmacological evaluation of compound **14b** at a concentration of 10  $\mu$ M against major CNS targets, including common GPCRs, enzymes, ion channels and transporters: Initial screening at a concentration of 10  $\mu$ M. All data are mean  $\pm$  SD (n = 4). No significant off-target binding (>50%) was observed at 10  $\mu$ M compound testing concentration.

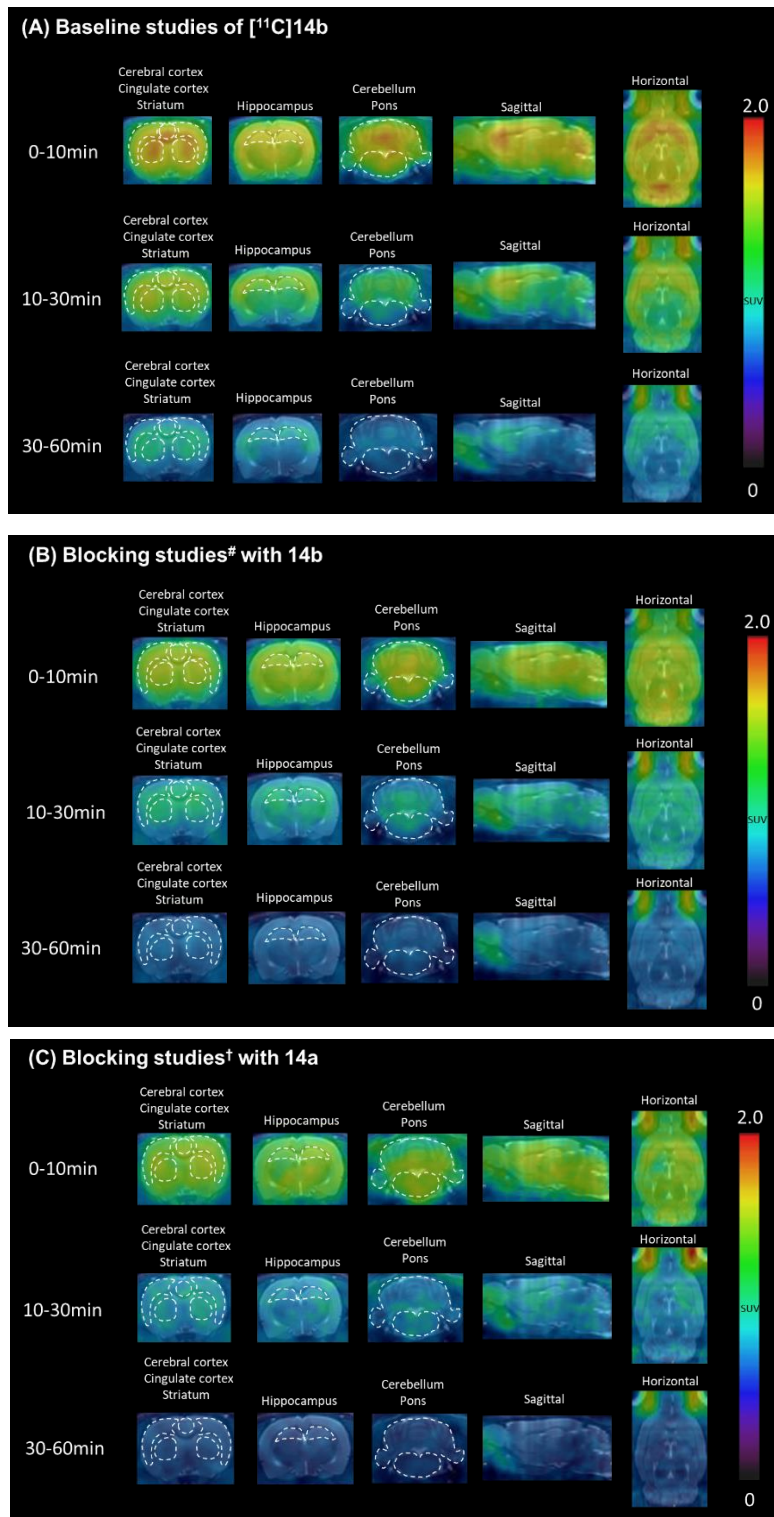

**Figure S12.** Representative PET/MRI fused images (summed at 0-10 min, 10-30 min and 30-60 min) and time-activity curves of [<sup>11</sup>C]14b under baseline and blocking conditions in SD rat brain. <sup>#</sup>Blocking conditions: **14b** (1 mg/kg), 30 min *i.v.* before radioligand injection; <sup>†</sup>Blocking conditions: **14a** (3 mg/kg), 30 min *i.v.* before radioligand injection. Data are presented as mean ± SEM (n = 3).

# NMR spectra of synthesized compounds

## <sup>1</sup>H spectrum of 11a

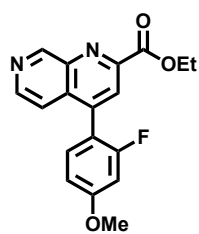

11a

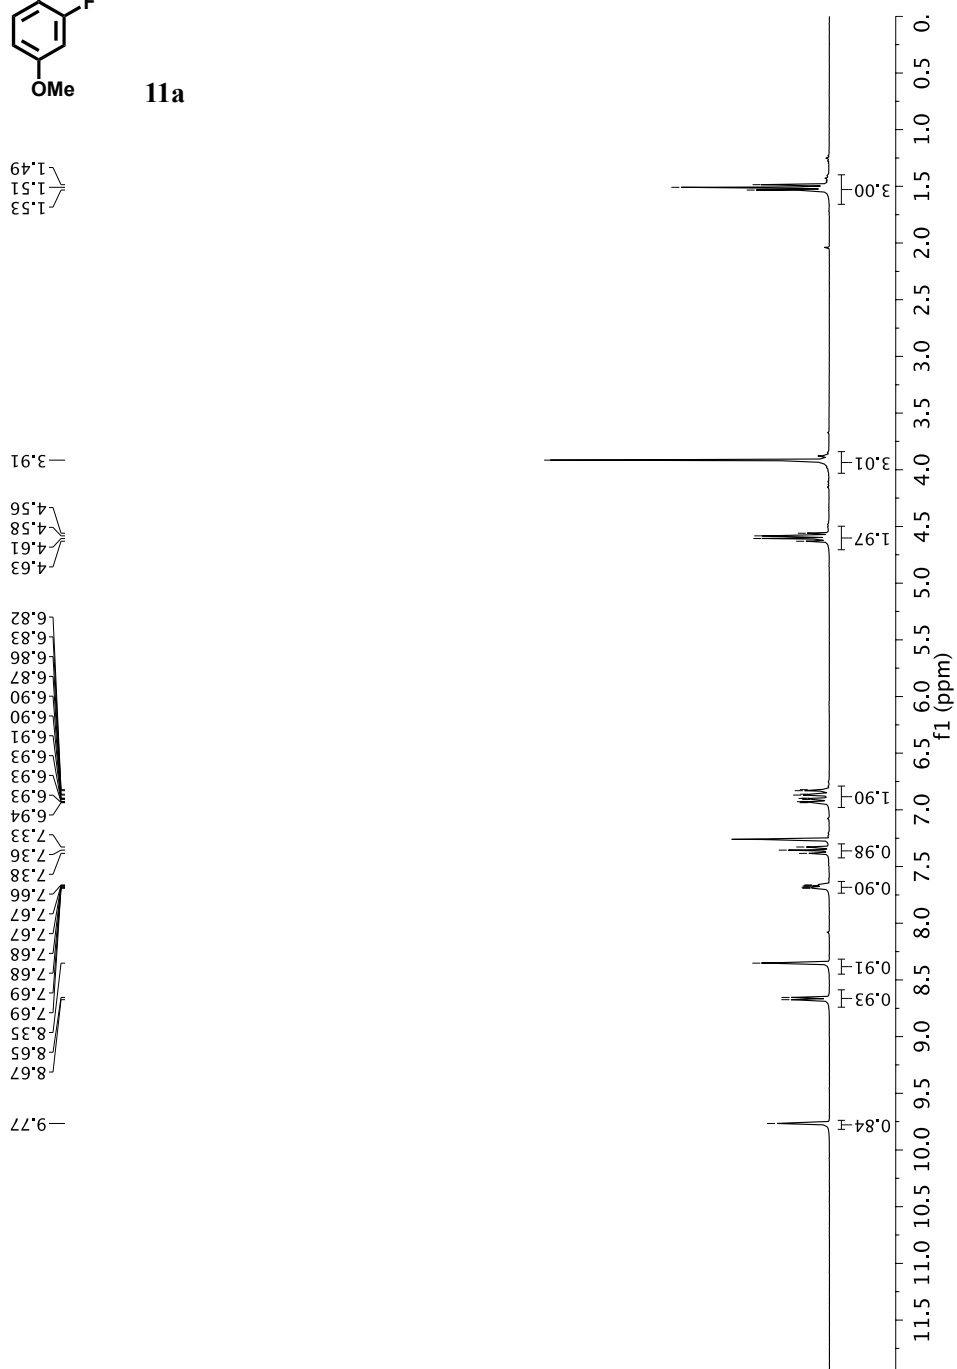

# <sup>13</sup>C spectrum of 11a

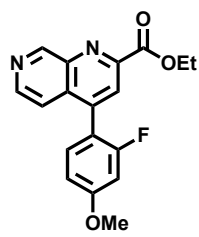

14.36

55.76

62.59

99.58

99.84

107.56

107.78

118.25

120.58

125.75

128.43

128.55

131.60

132.00

132.10

142.68

144.97

145.76

149.40

155.63

157.86

157.96

163.23

164.83

165.71

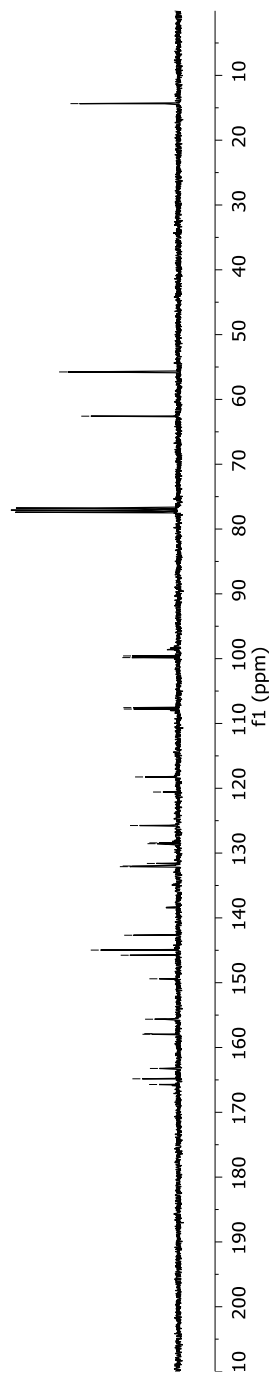

# <sup>1</sup>H spectrum of 11b

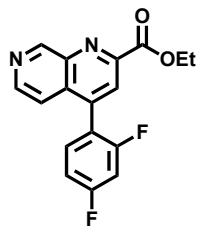

1.54  
1.52  
1.49

4.54  
4.57  
4.59  
4.62  
4.64  
7.04  
7.05  
7.07  
7.08  
7.08  
7.10  
7.10  
7.11  
7.11  
7.11  
7.13  
7.13  
7.13  
7.14  
7.15  
7.15  
7.16  
7.16  
7.40  
7.42  
7.43  
7.45  
7.46  
7.48  
7.57  
7.59  
7.61  
8.35  
8.68  
8.70

9.79

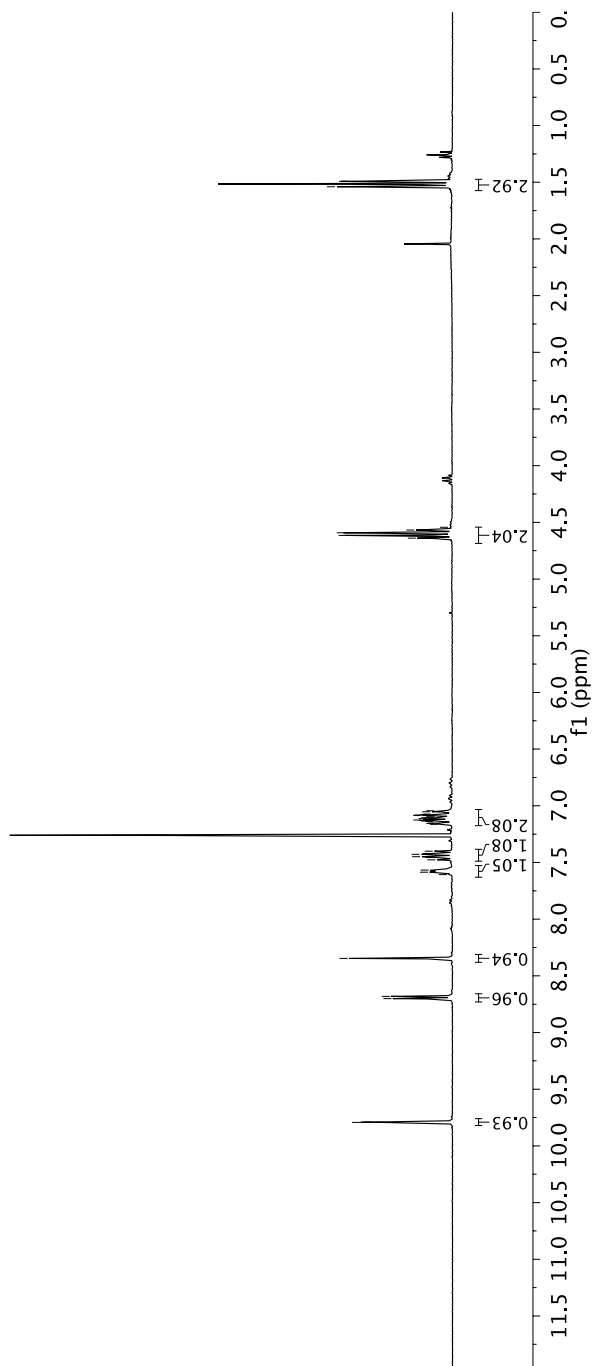

# <sup>13</sup>C spectrum of 11b

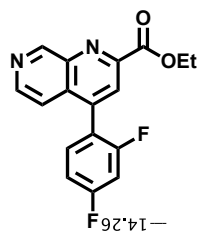

11b

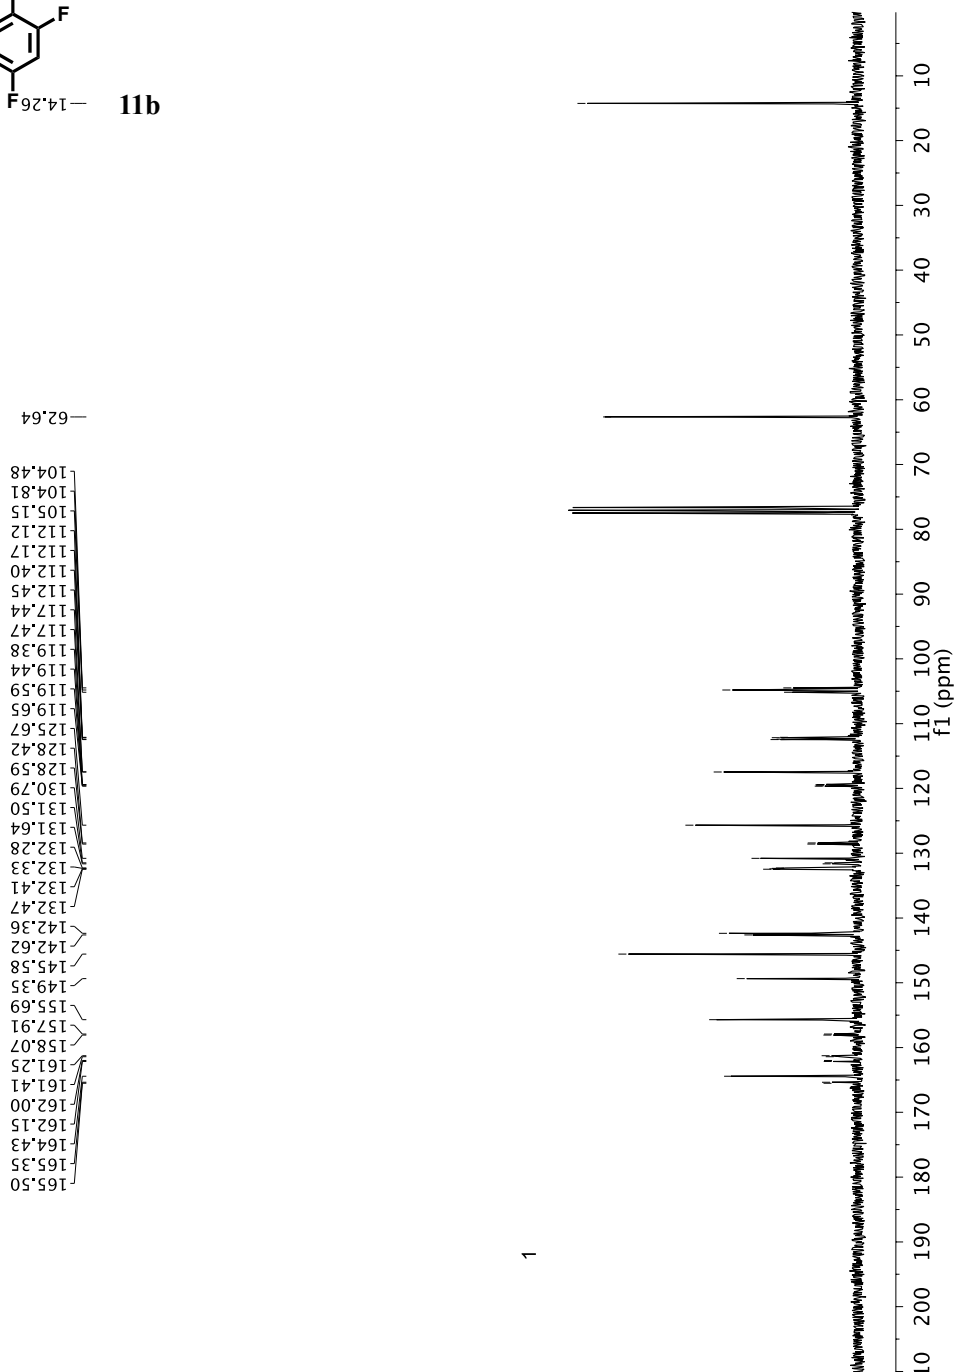

# <sup>1</sup>H spectrum of 11c

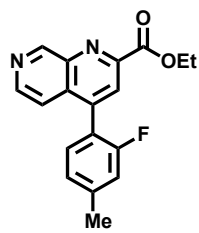

11c

1.43  
1.45  
1.48

2.43  
4.50  
4.53  
4.55  
4.57  
7.03  
7.04  
7.04  
7.04  
7.07  
7.07  
7.08  
7.08  
7.10  
7.10  
7.10  
7.11  
7.12  
7.13  
7.13  
7.13  
7.24  
7.26  
7.27  
7.29  
7.53  
7.54  
7.54  
7.55  
7.55  
7.56  
7.56  
7.57

8.29  
8.29  
8.60  
8.62

9.72

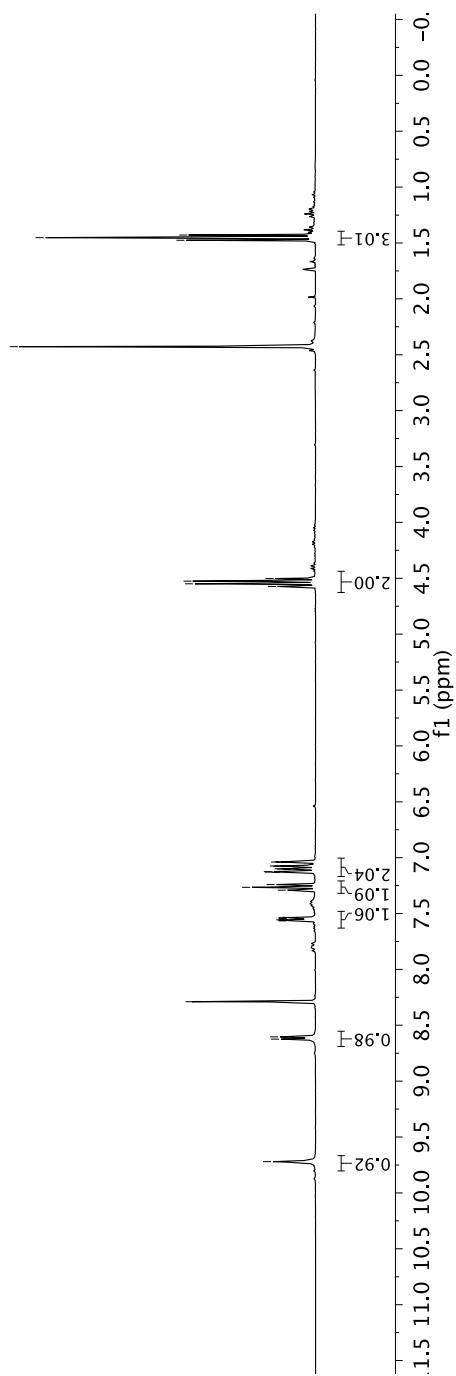



# <sup>13</sup>C spectrum of 11c

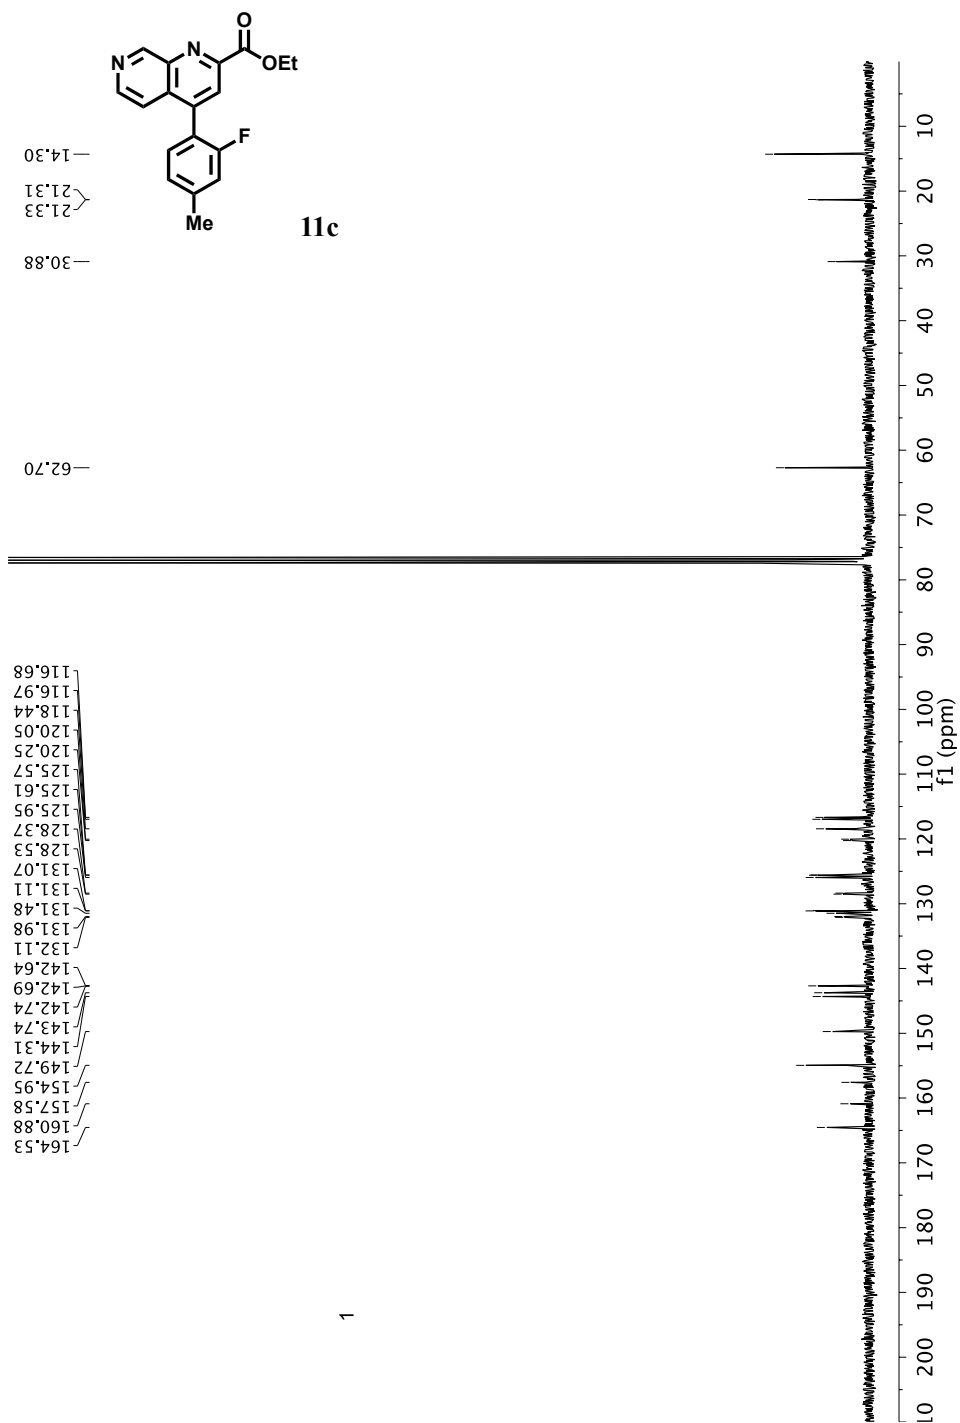

1

# <sup>1</sup>H spectrum of 11d

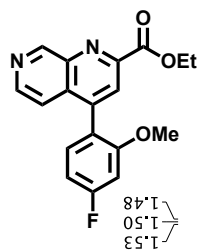

3.72

4.55  
4.58  
4.60  
4.63

6.81  
6.81  
6.84  
6.85  
6.87  
6.87  
6.89  
6.90  
7.26  
7.53  
7.55

8.30  
8.60  
8.62

9.75

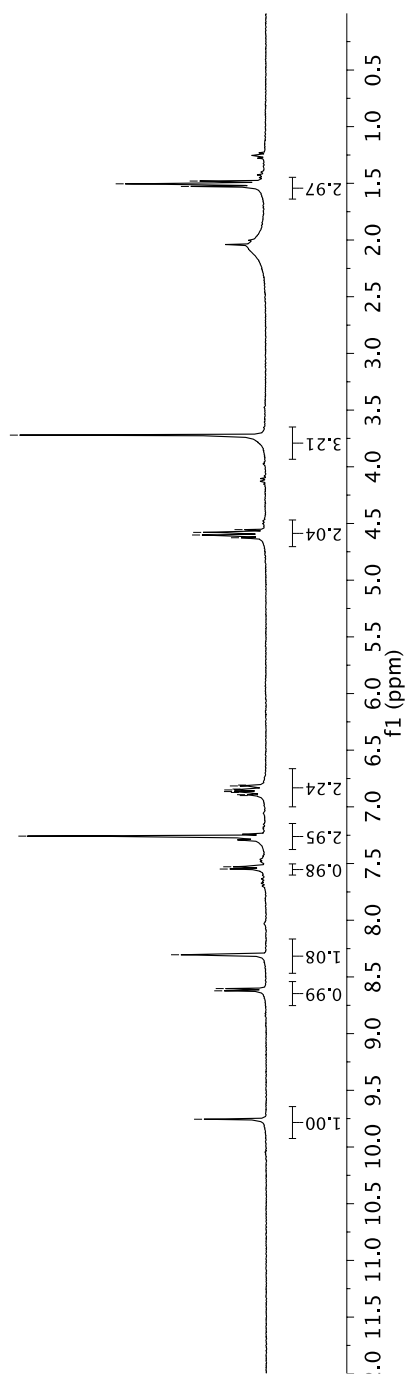

# <sup>13</sup>C spectrum of 11d

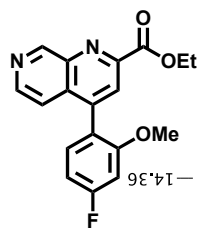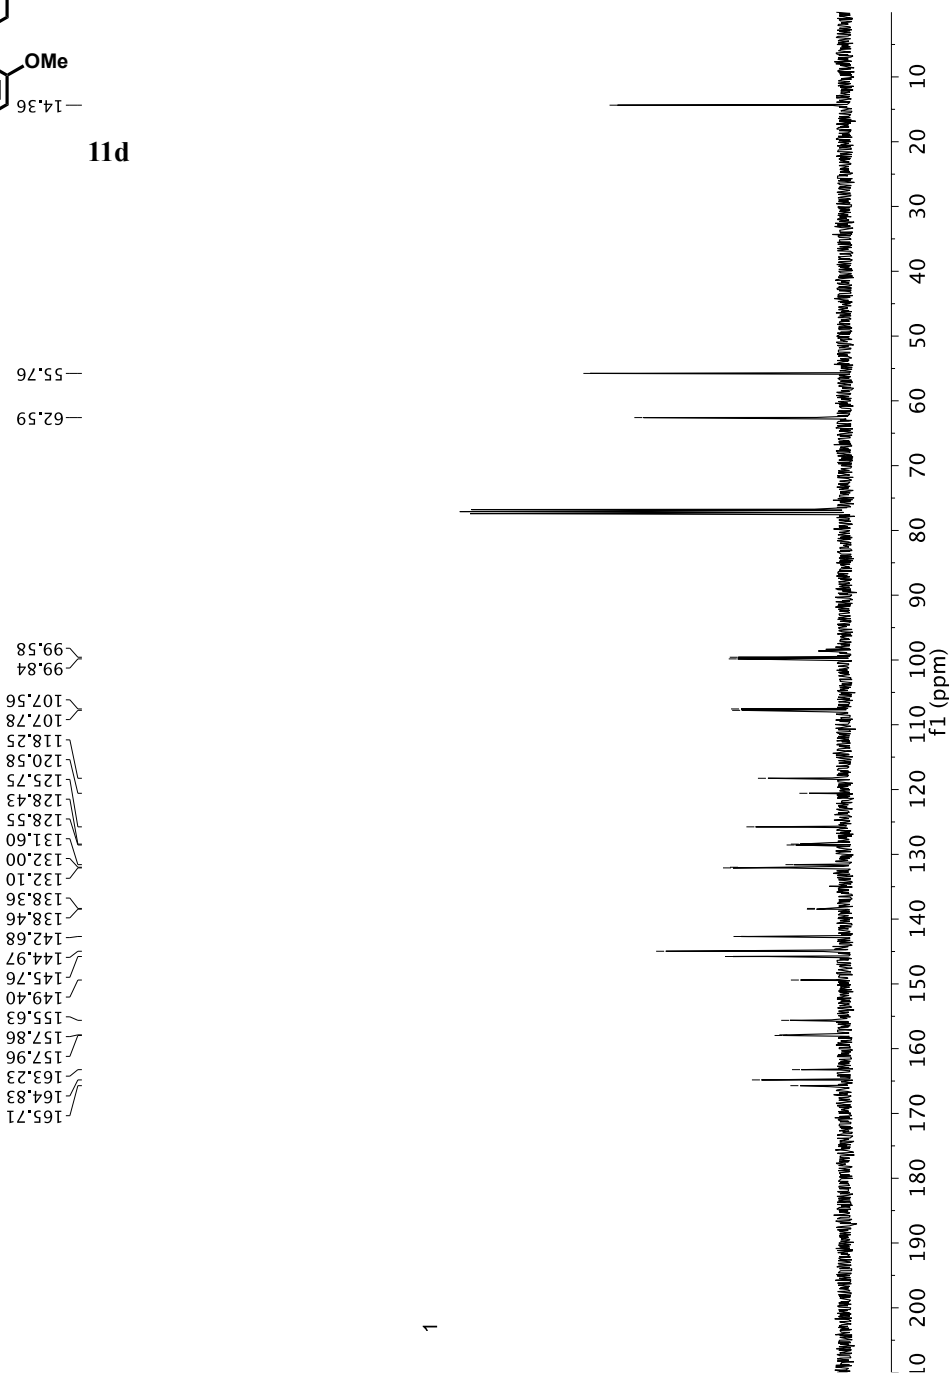

1

# <sup>1</sup>H spectrum of 11g

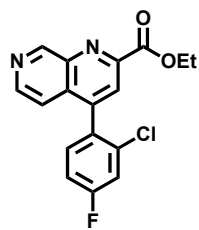

11g

1.53  
1.51  
1.50

4.63  
4.61  
4.59  
4.58

7.19  
7.19  
7.21  
7.21  
7.23  
7.23  
7.35  
7.36  
7.37  
7.38  
7.39  
7.40  
7.40  
8.29  
8.65  
8.67

9.79

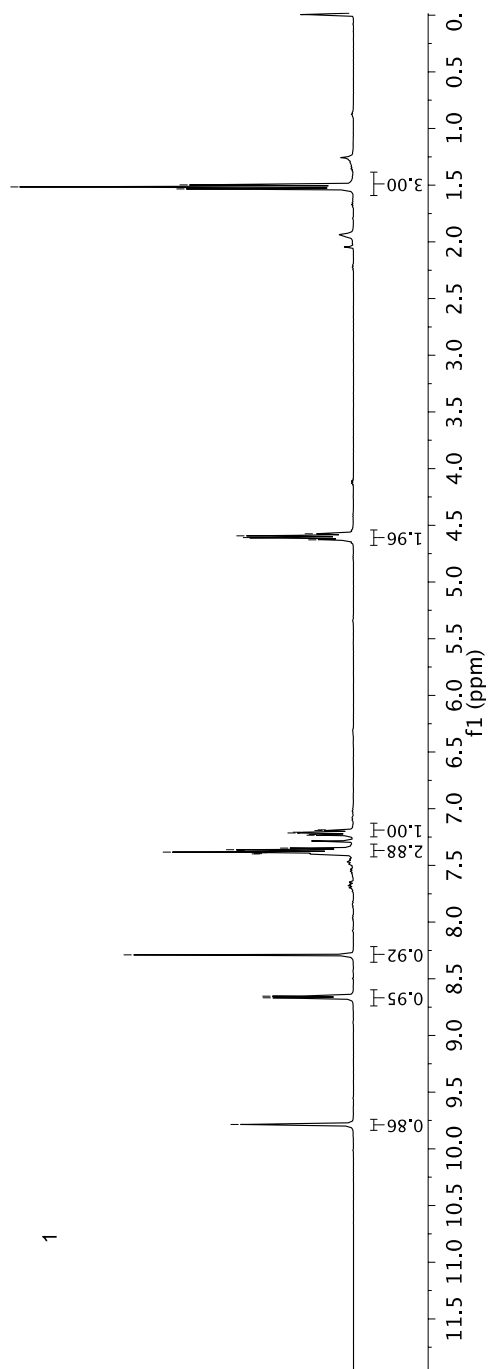

# <sup>13</sup>C spectrum of 11g

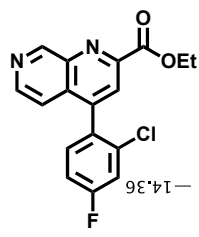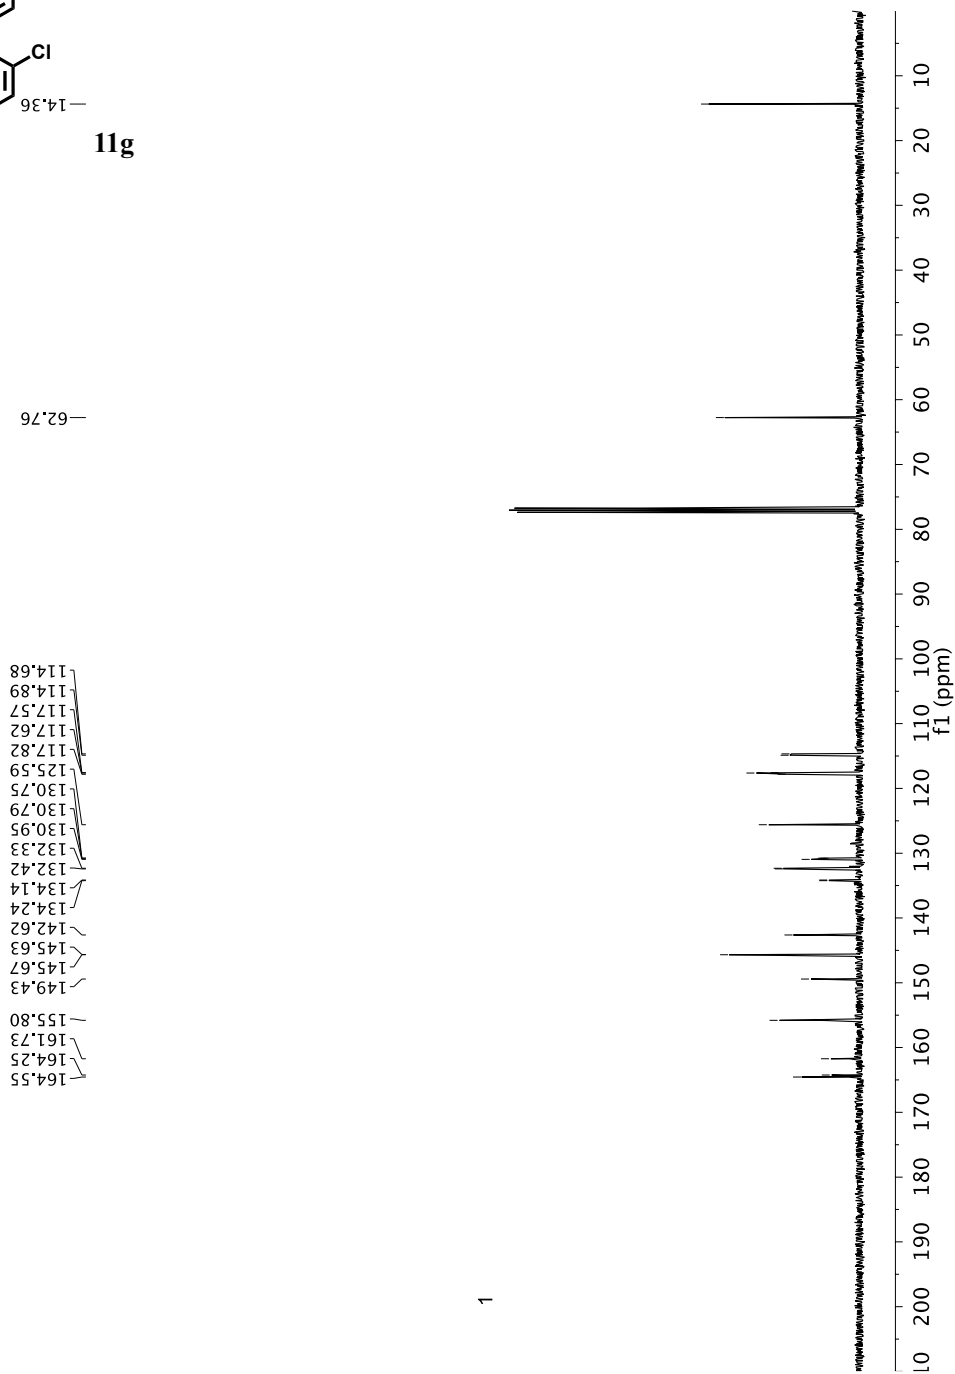

1

# <sup>1</sup>H spectrum of 13a

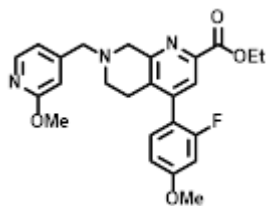

13a

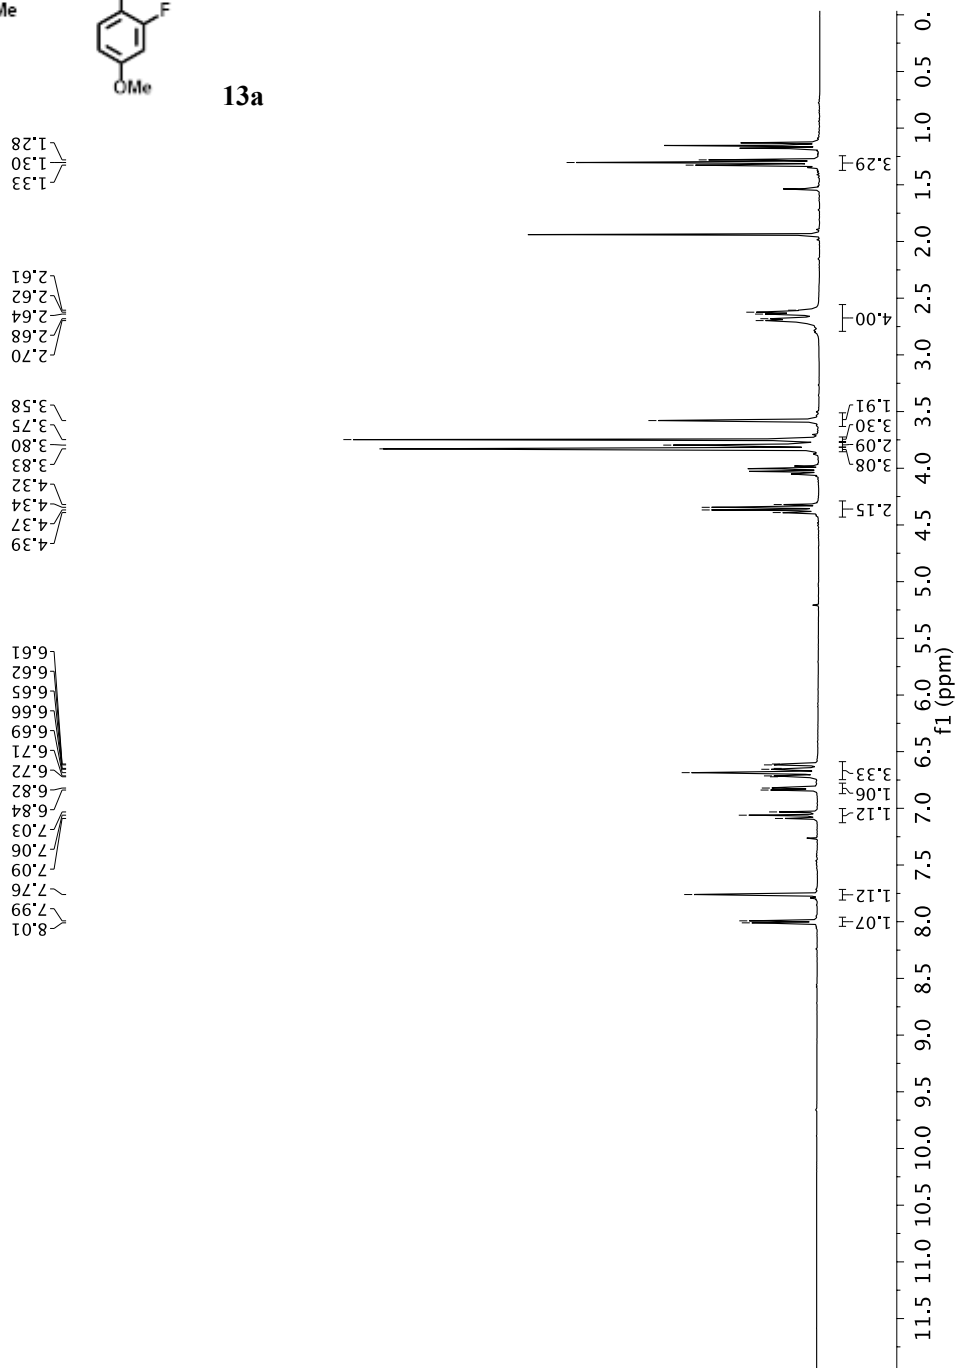

# <sup>13</sup>C spectrum of 13a

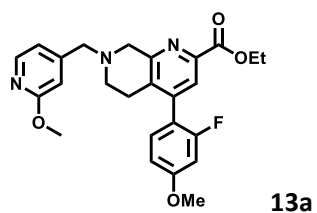

14.35  
27.17  
49.90  
53.41  
55.71  
58.86  
61.19  
61.84

101.77  
102.02  
110.38  
110.41  
110.61  
117.26  
124.70  
128.45  
128.57  
131.04  
131.10  
132.03  
132.12  
133.07  
144.81  
145.34  
146.83  
149.95  
155.58  
158.55  
161.01  
161.38  
161.49  
164.61  
165.27

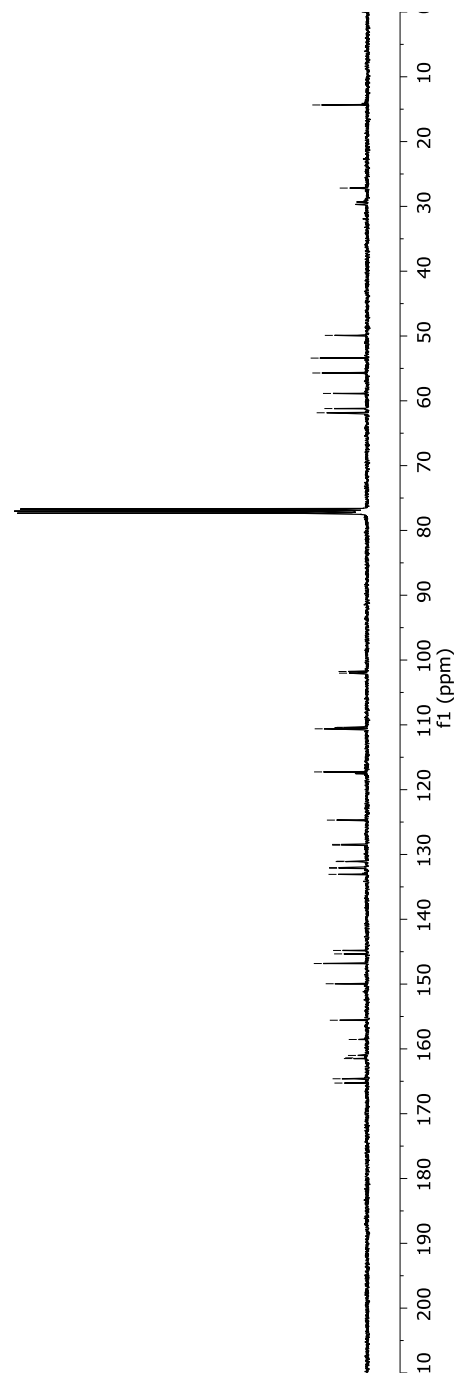

# <sup>1</sup>H spectrum of 13b

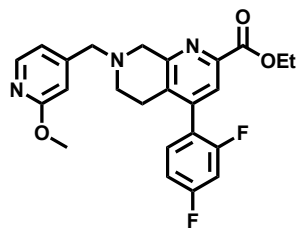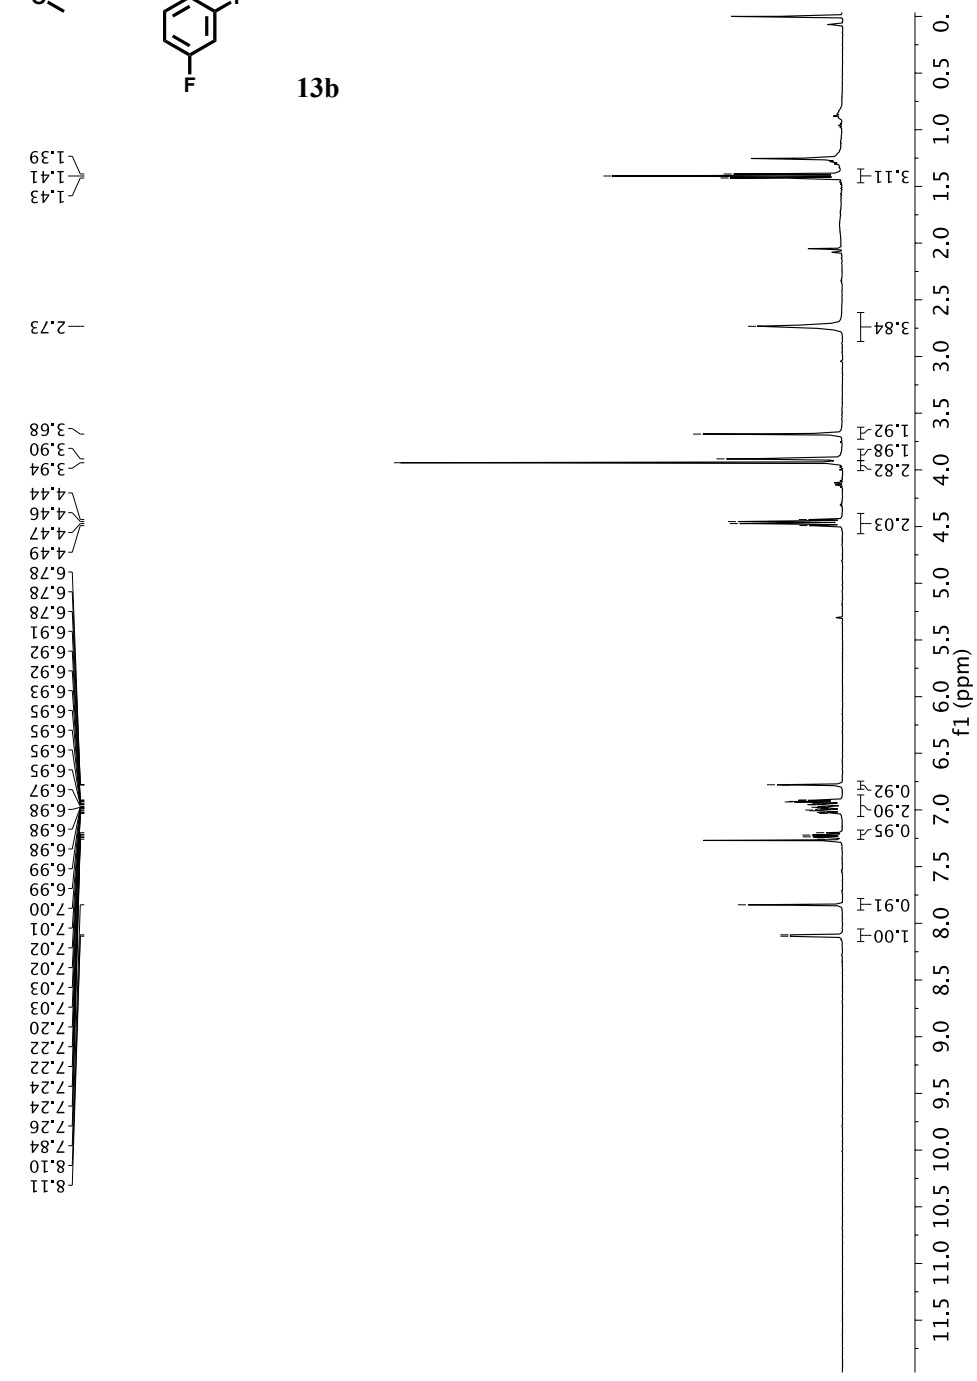



# <sup>13</sup>C spectrum of 13b

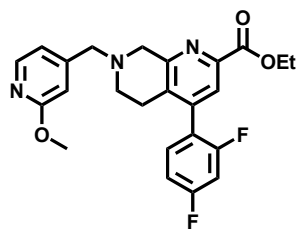

13b

14.34

26.99

49.78

53.43

58.67

61.11

61.95

104.14

104.48

104.81

110.67

111.79

112.07

117.26

121.40

124.49

124.91

131.39

131.46

131.52

131.59

131.64

132.83

143.95

145.54

146.90

155.66

164.62

165.07

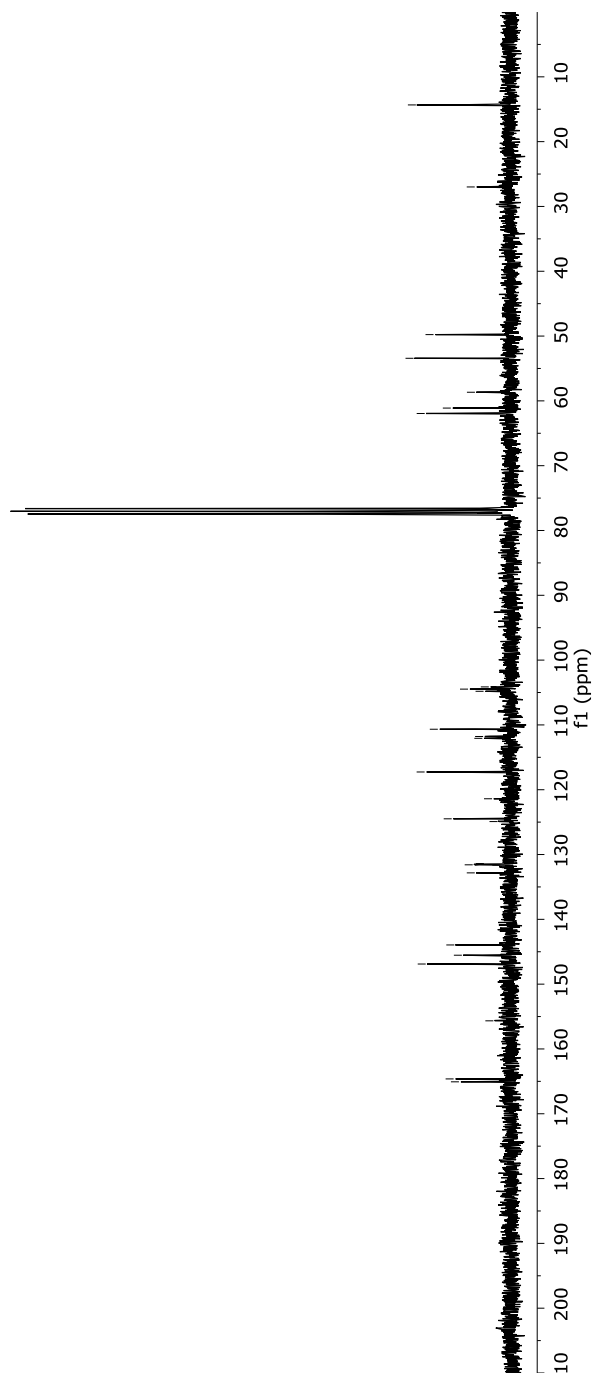

# <sup>1</sup>H spectrum of 13c

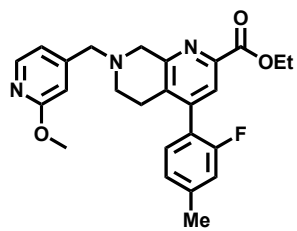

13c

1.36  
1.38  
1.41

2.40  
2.40  
2.71  
2.73  
2.75  
2.77

3.68  
3.89  
3.92  
4.40  
4.42  
4.45  
4.47

6.76  
6.76  
6.77  
6.77  
6.91  
6.91  
6.92  
6.93  
6.95  
6.96  
6.96  
6.96  
6.99  
6.99  
7.00  
7.02  
7.02  
7.02  
7.02  
7.04  
7.04  
7.05  
7.05  
7.07  
7.10  
7.12  
7.83  
8.08  
8.08  
8.10

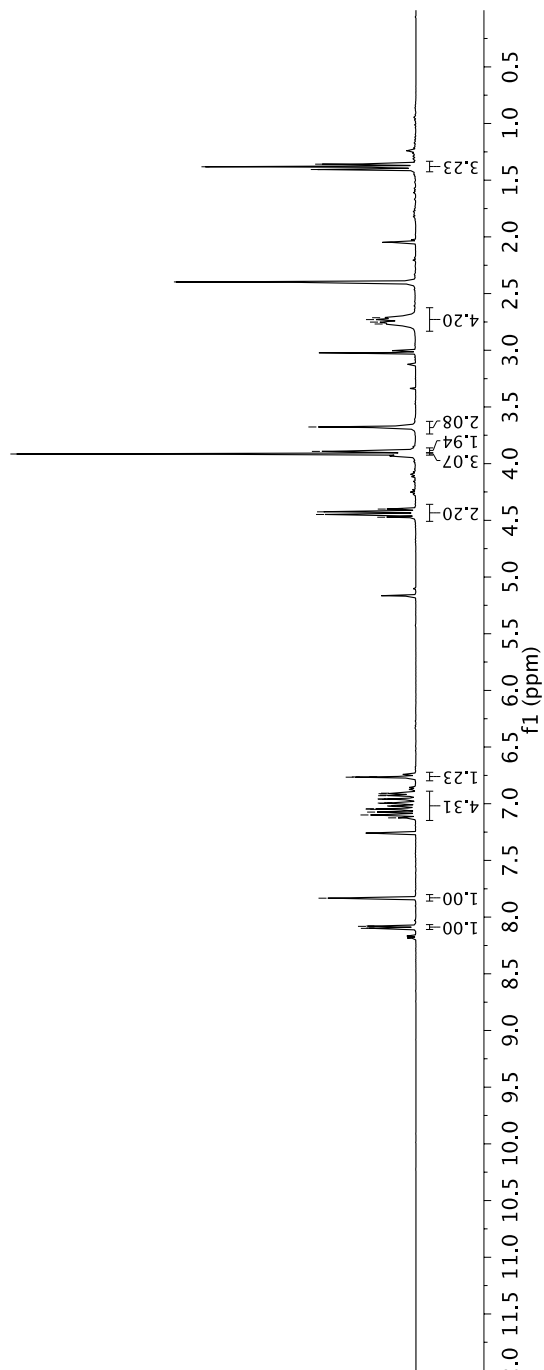

# <sup>13</sup>C spectrum of 13c

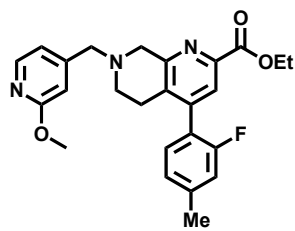

13c

14.29  
21.14  
21.16  
26.93  
49.81  
53.37  
58.62  
61.05  
61.80  
109.26  
110.64  
114.98  
116.25  
116.53  
117.24  
122.10  
122.32  
124.53  
125.12  
125.17  
130.21  
130.26  
132.80  
141.32  
141.42  
144.97  
145.32  
146.81  
147.55  
157.22  
160.50  
164.55  
165.14

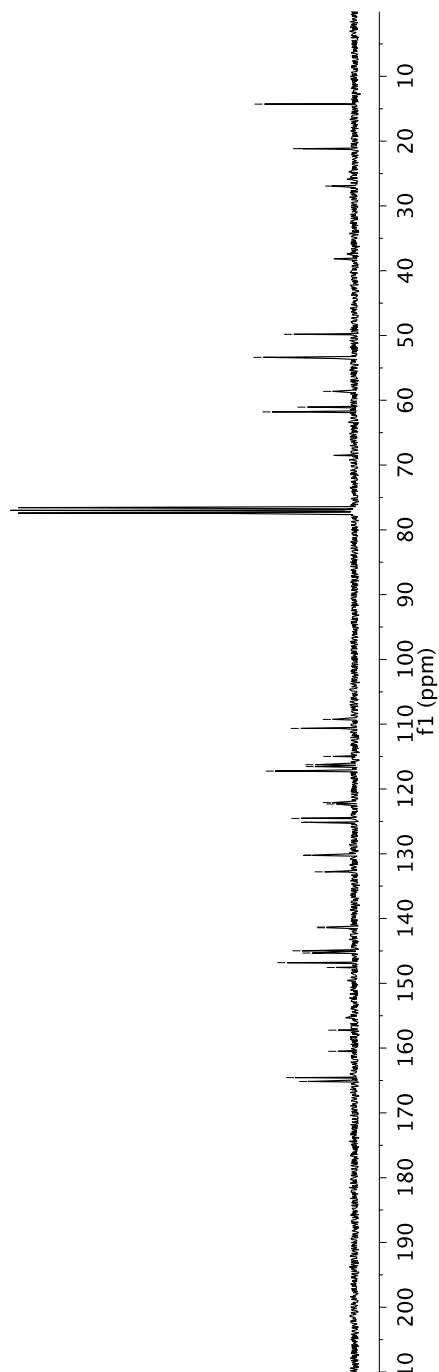

# <sup>1</sup>H spectrum of 13d

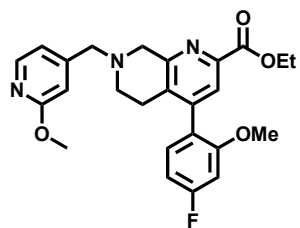

13d

1.37  
1.39  
1.40

2.70

3.67  
3.76  
3.88  
3.92  
4.42  
4.43  
4.45  
4.47

6.70  
6.70  
6.72  
6.72  
6.73  
6.74  
6.75  
6.76  
6.77  
6.91  
6.92  
7.04  
7.06  
7.06  
7.08  
7.78  
8.09  
8.10

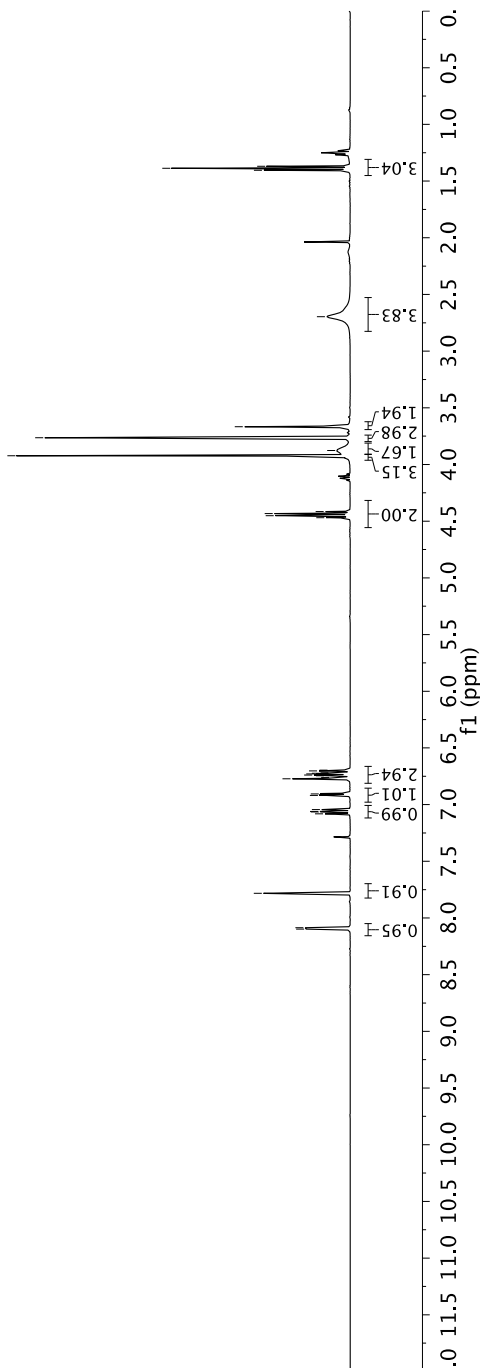

# <sup>13</sup>C spectrum of 13d

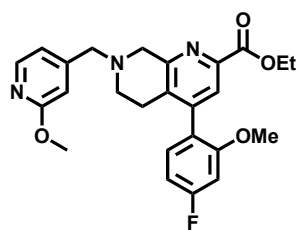

13d

- 165.36
- 165.08
- 164.57
- 162.62
- 157.41
- 157.31
- 155.15
- 149.89
- 146.93
- 146.79
- 145.19
- 133.23
- 130.93
- 130.83
- 124.76
- 122.68
- 122.64
- 117.30
- 110.66
- 107.33
- 107.12
- 99.47
- 99.22
- 61.75
- 61.28
- 58.82
- 55.73
- 53.38
- 49.97
- 26.93
- 14.35

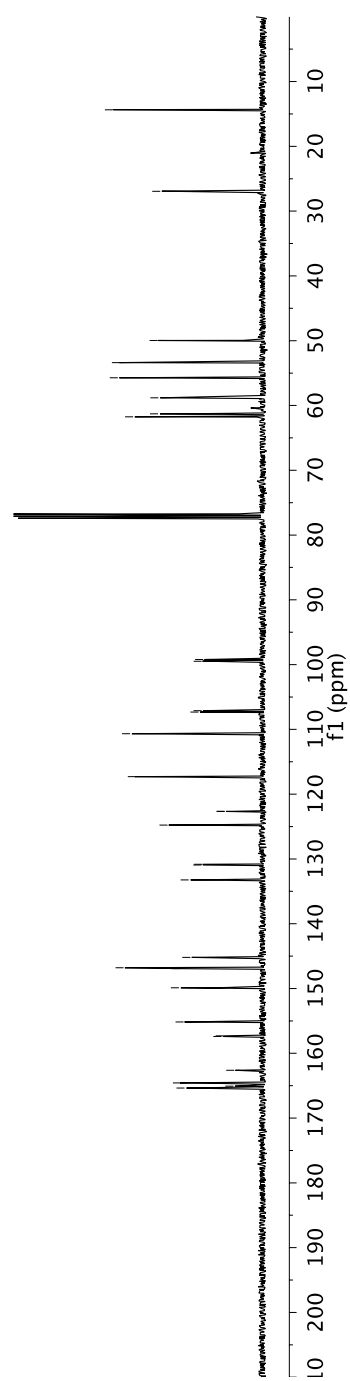

# <sup>1</sup>H spectrum of 13e

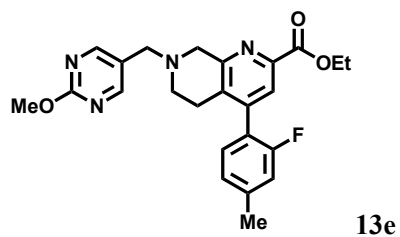

1.36  
1.39  
1.41  
2.40  
2.72  
2.73  
2.74  
2.76  
3.66  
3.88  
4.01  
4.41  
4.42  
4.43  
4.44  
4.45  
4.45  
4.47  
4.48  
4.48  
6.96  
6.96  
6.96  
7.00  
7.00  
7.02  
7.02  
7.03  
7.03  
7.05  
7.05  
7.05  
7.05  
7.07  
7.08  
7.10  
7.12  
7.84  
8.50

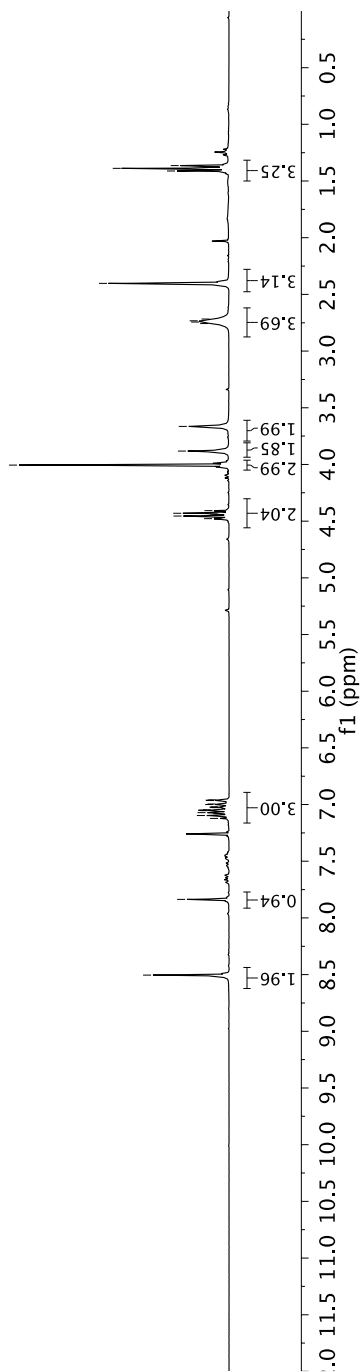

# <sup>13</sup>C spectrum of 13e

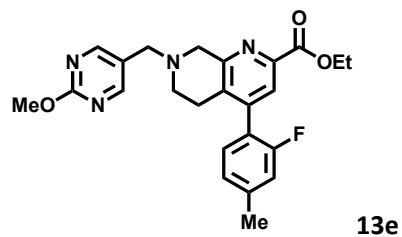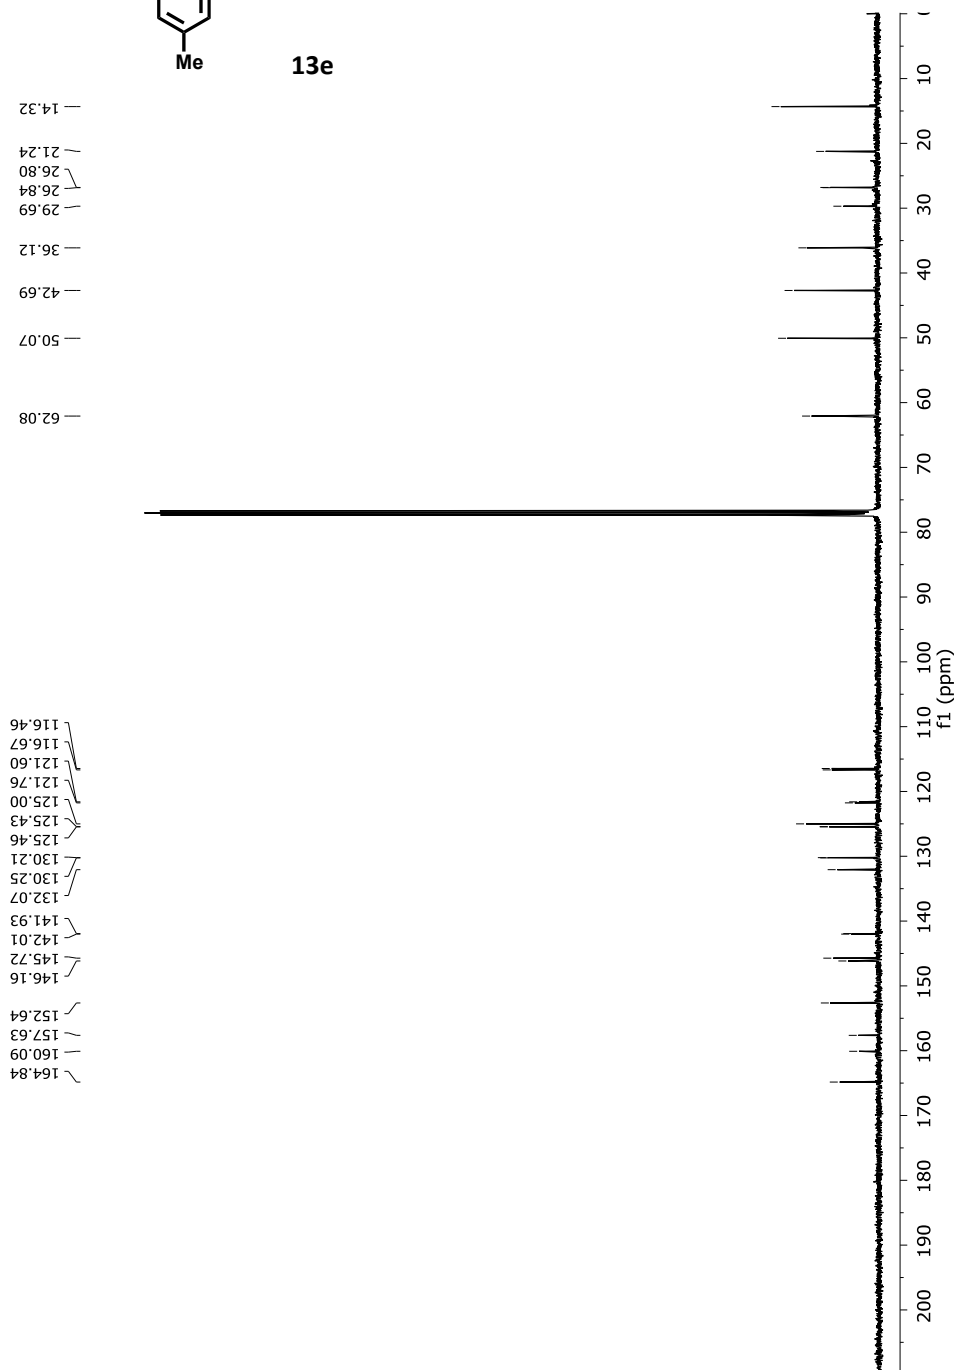

# <sup>1</sup>H spectrum of 13f

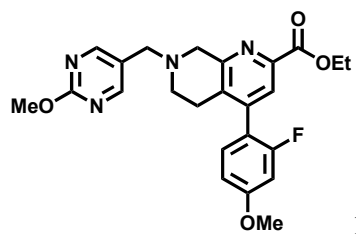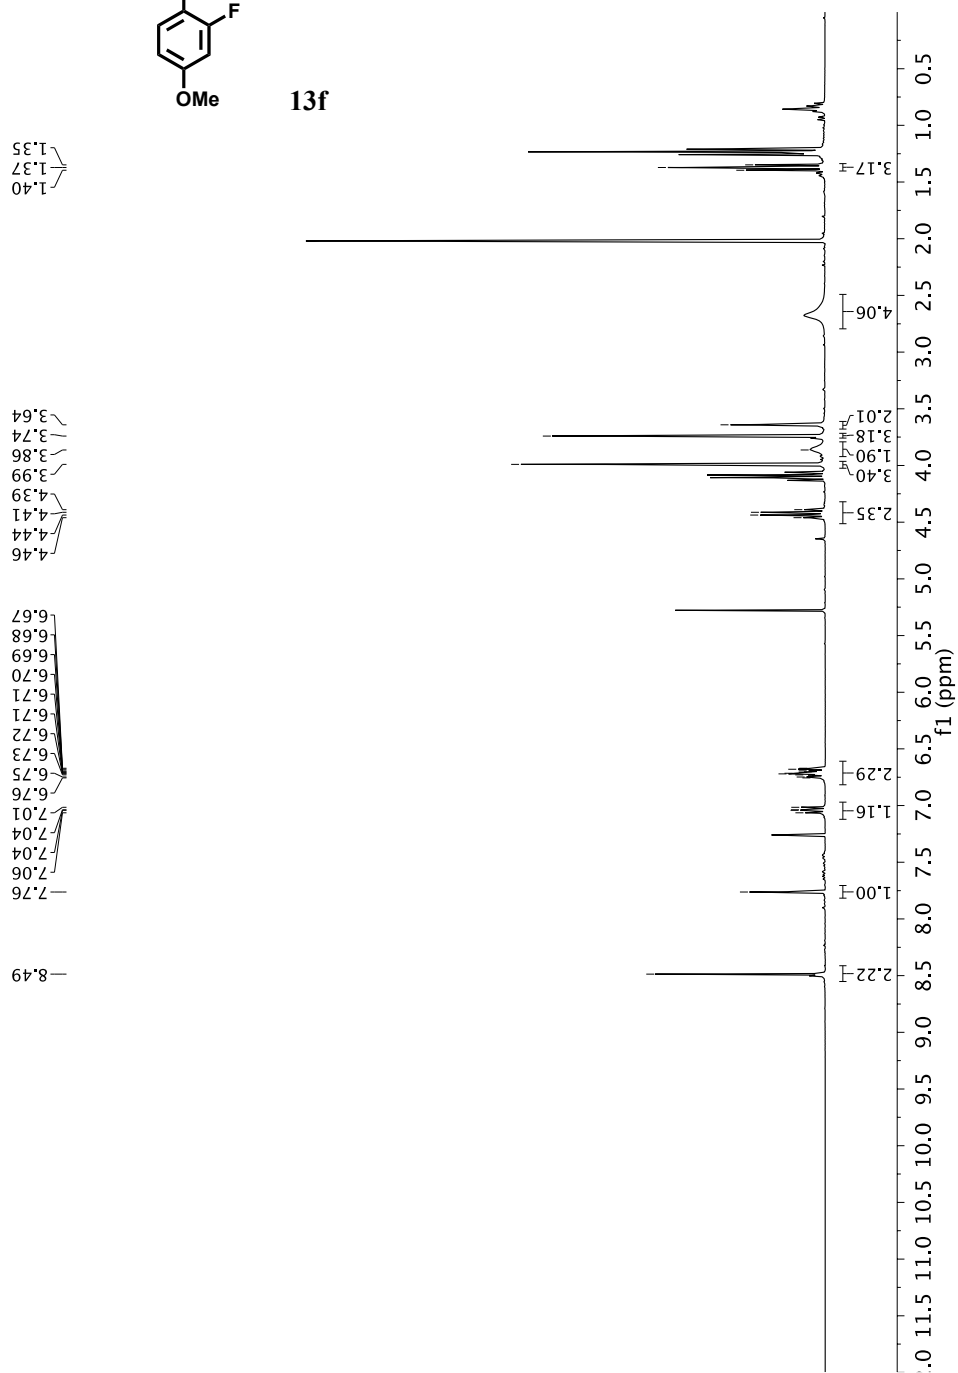



# <sup>13</sup>C spectrum of 13f

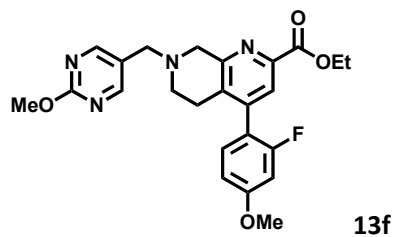

14.33

27.08

49.59

54.95

55.72

56.57

58.58

61.95

101.78

102.04

110.42

110.45

117.40

117.23

124.09

124.80

128.47

128.59

131.02

131.07

132.02

132.12

133.12

144.97

145.28

155.31

158.53

159.91

160.99

161.44

161.55

165.32

165.34

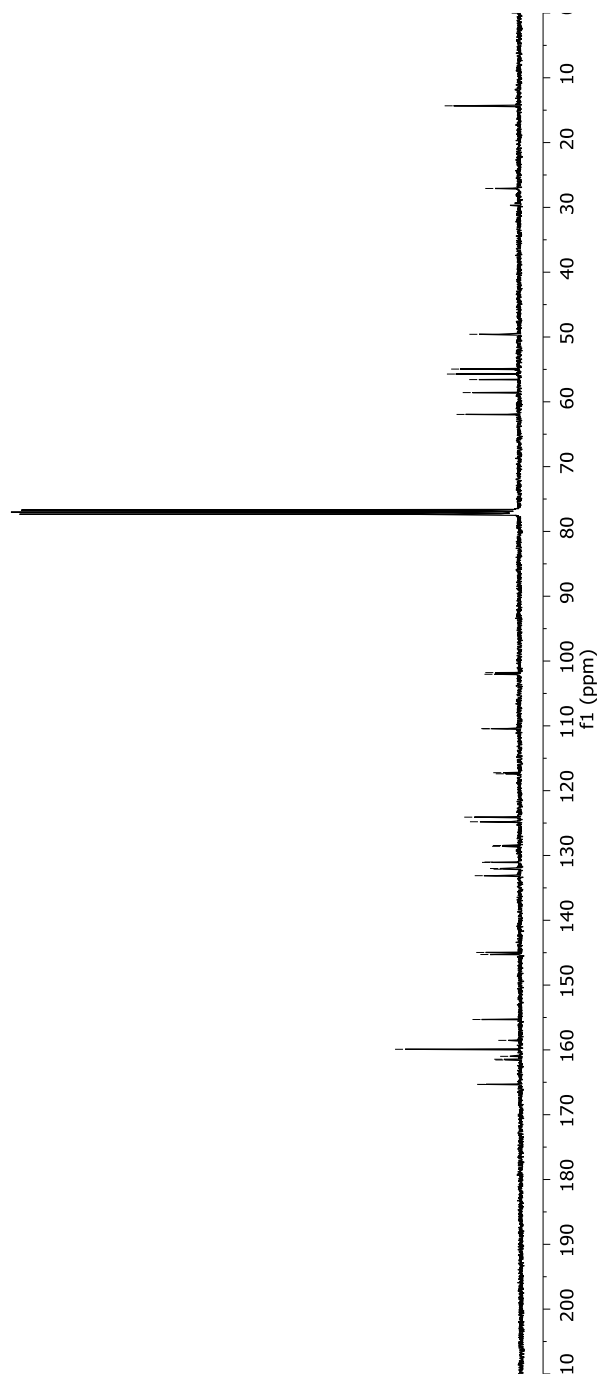

# <sup>1</sup>H spectrum of 13g

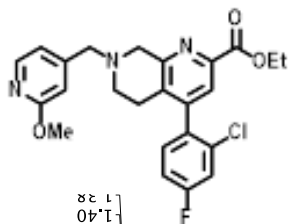

13g

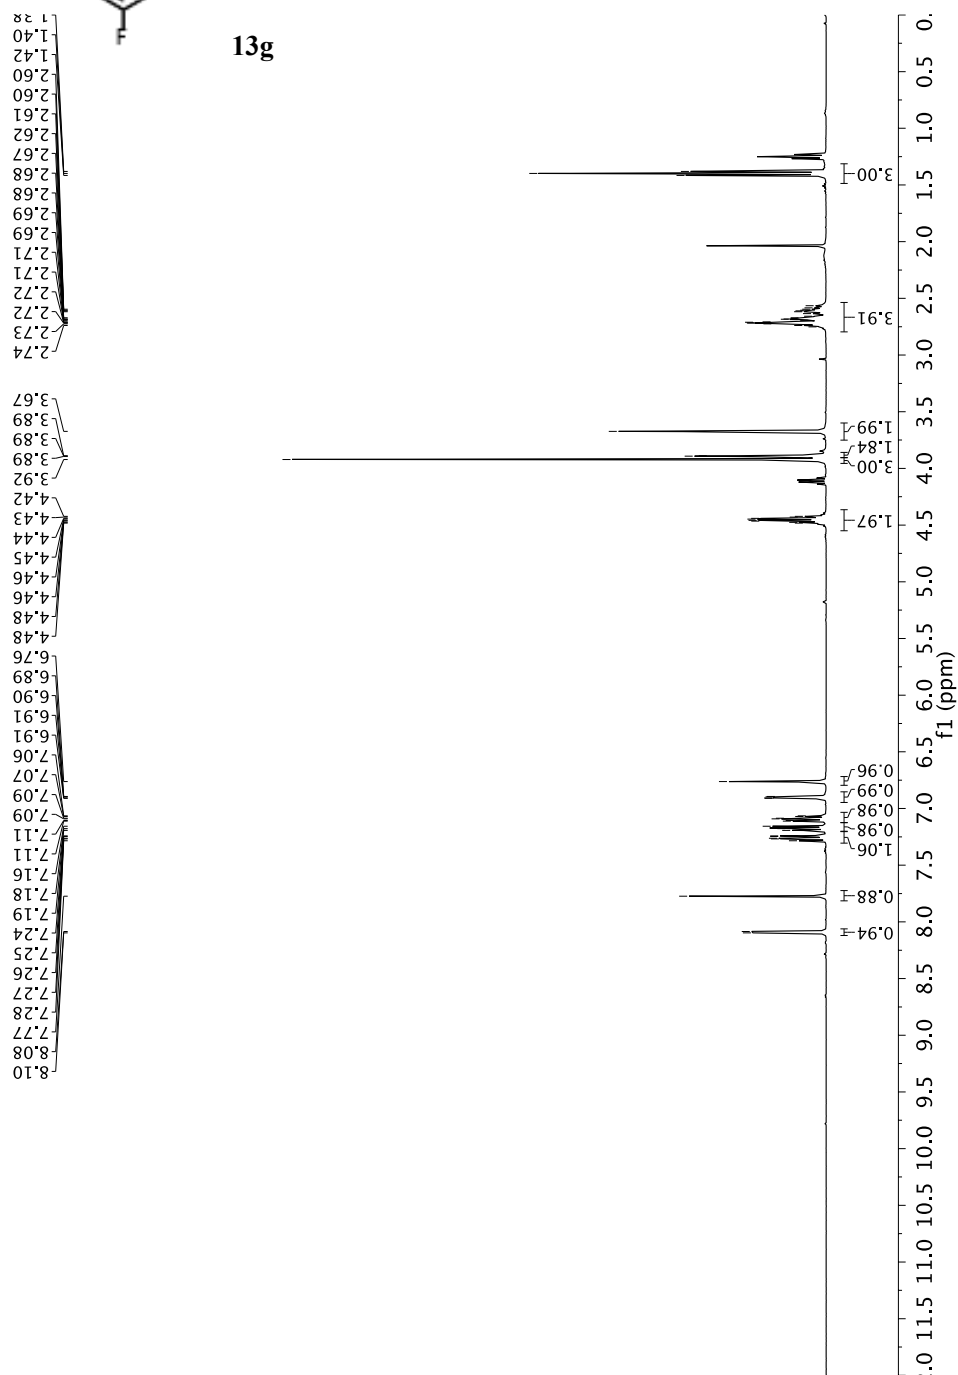

# <sup>13</sup>C spectrum of 13g

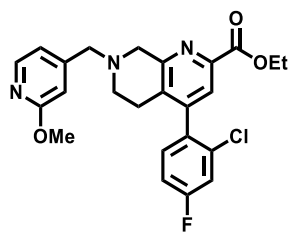

13g

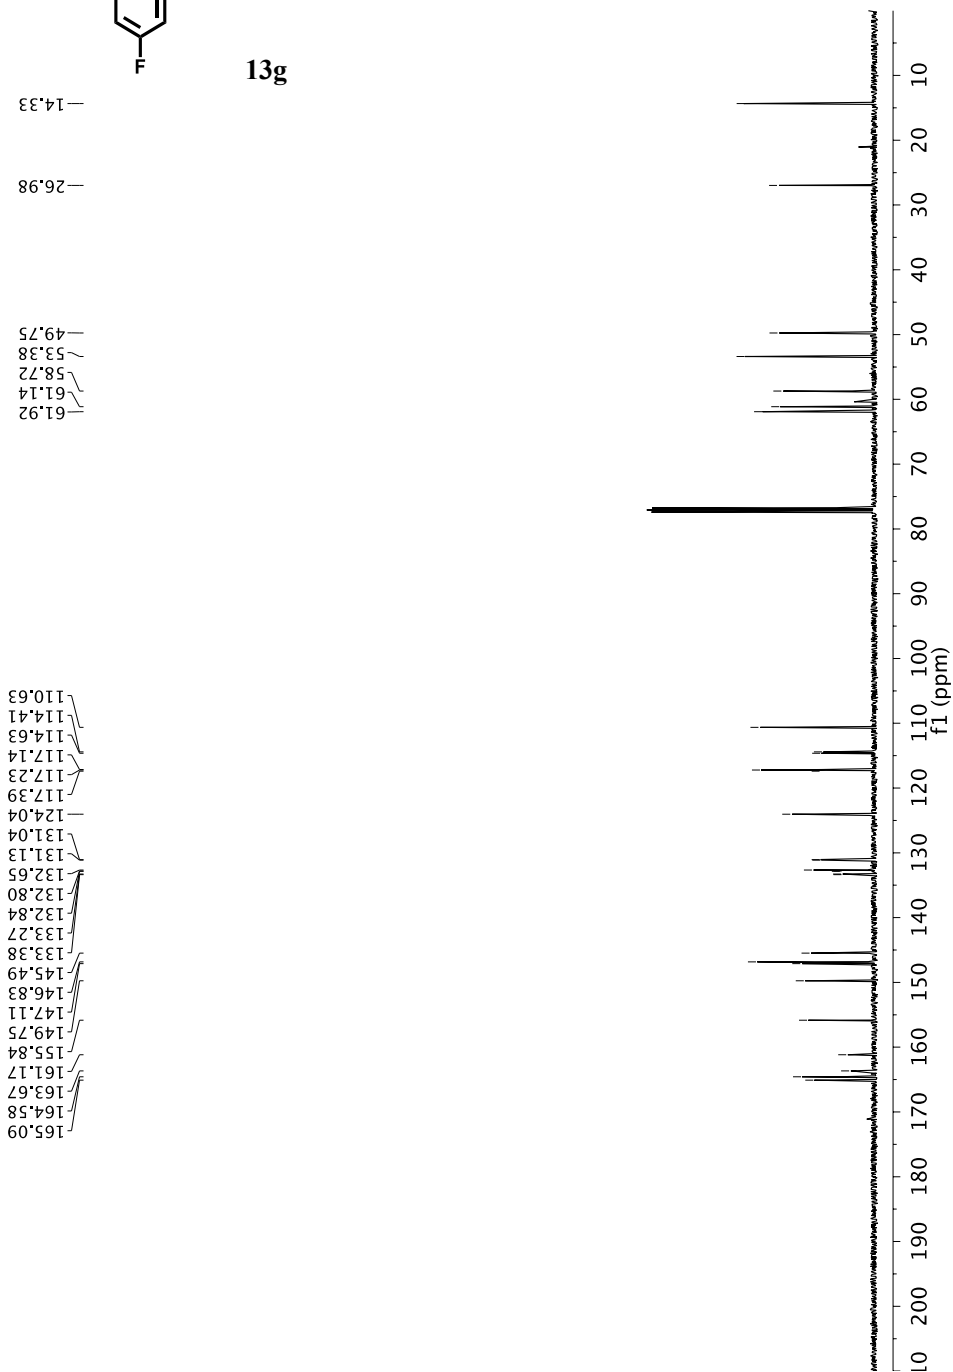

# <sup>1</sup>H spectrum of 14a

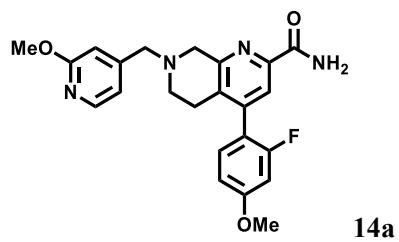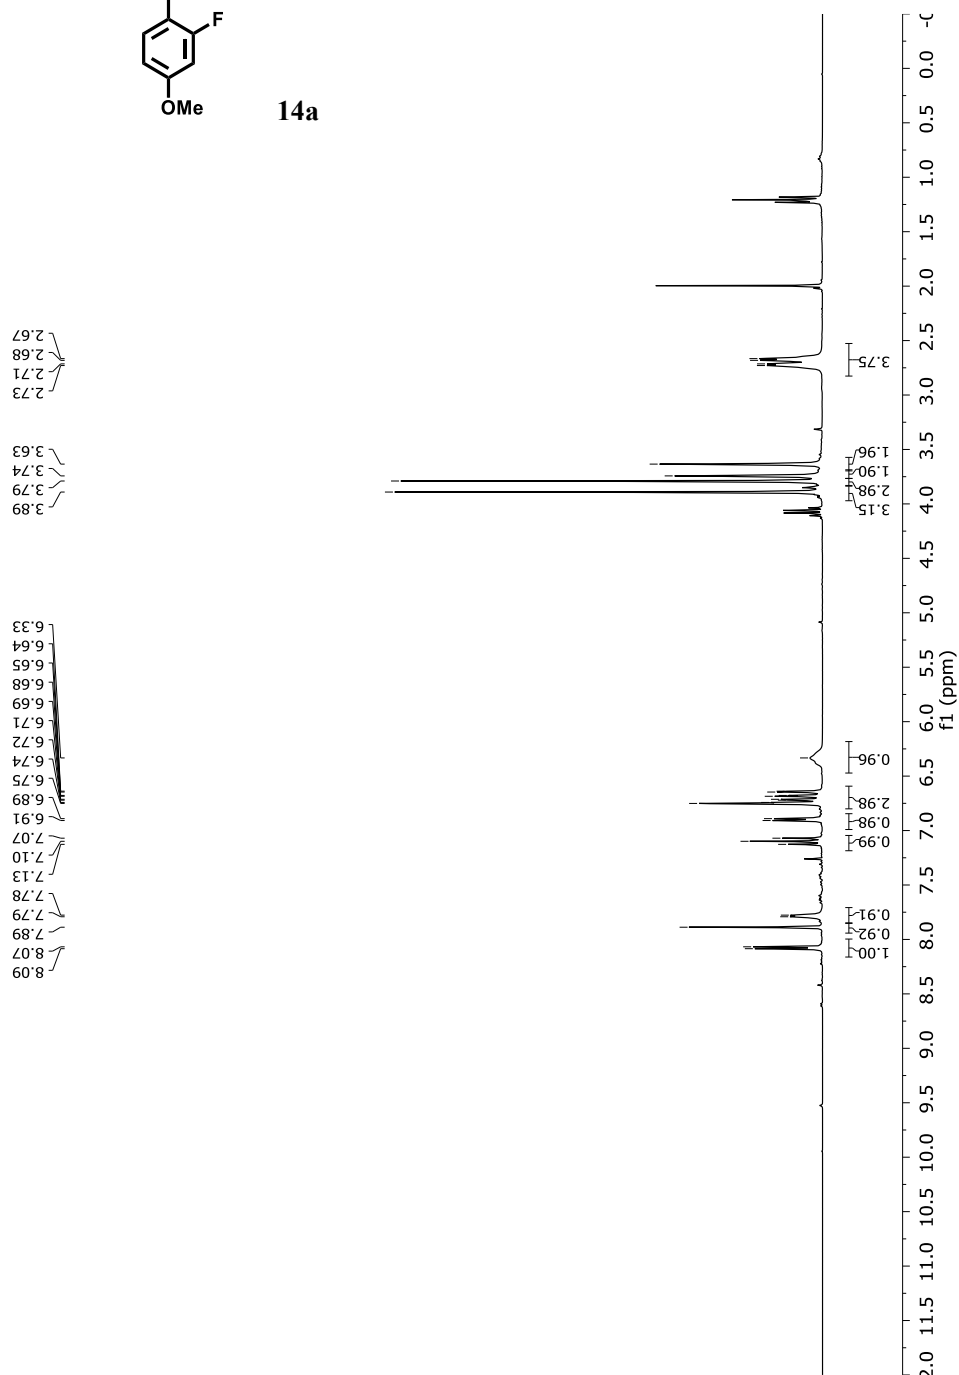

# <sup>13</sup>C spectrum of 14a

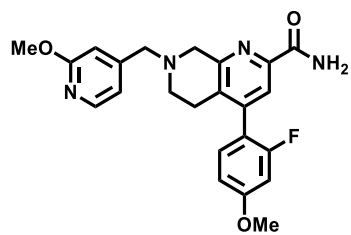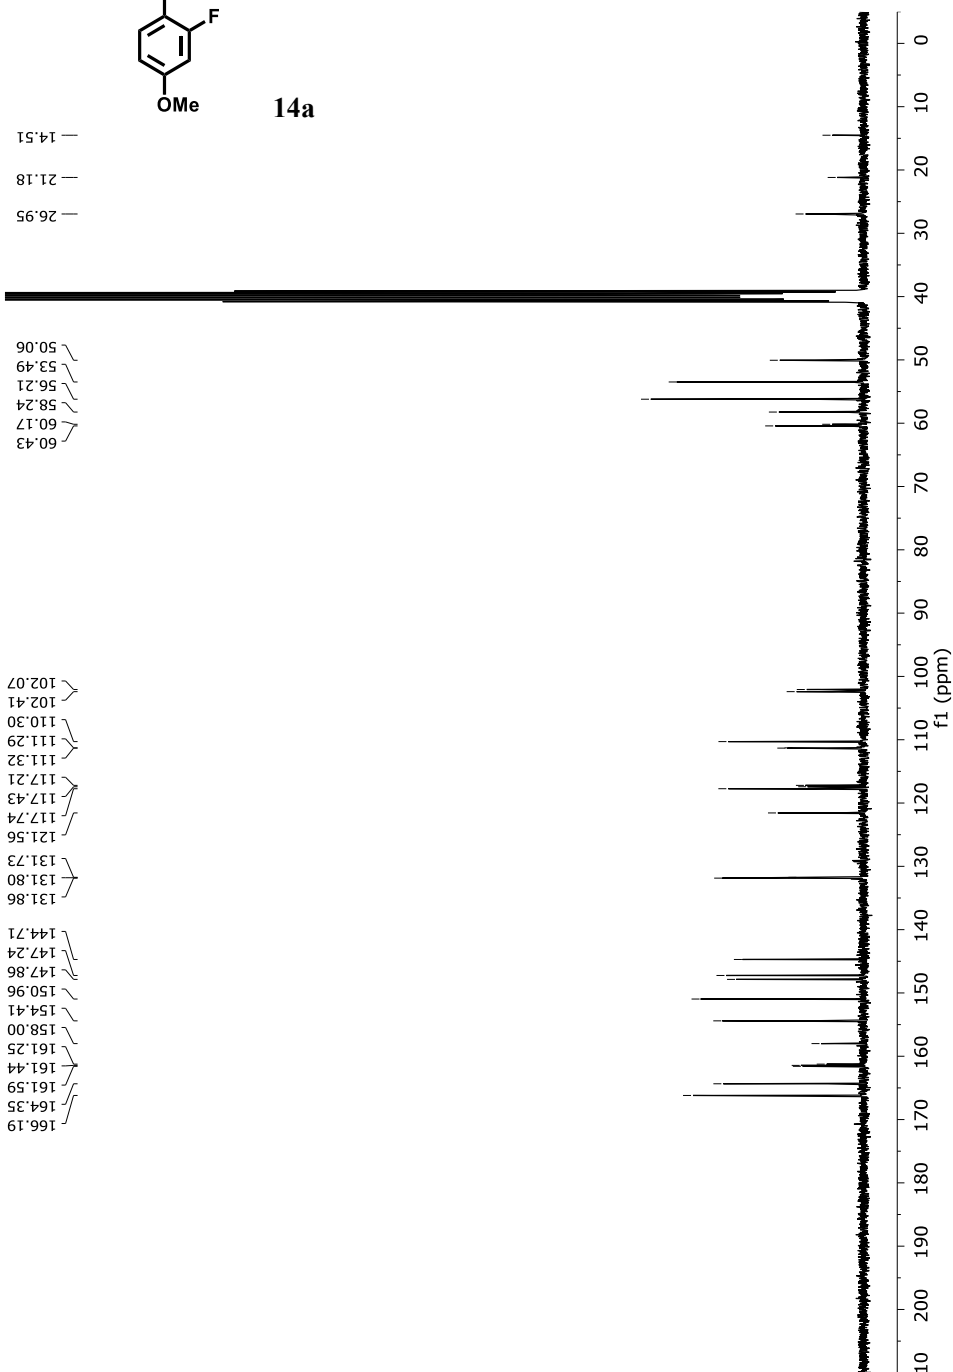

# <sup>1</sup>H spectrum of 14b

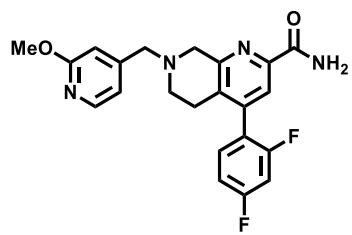

14b

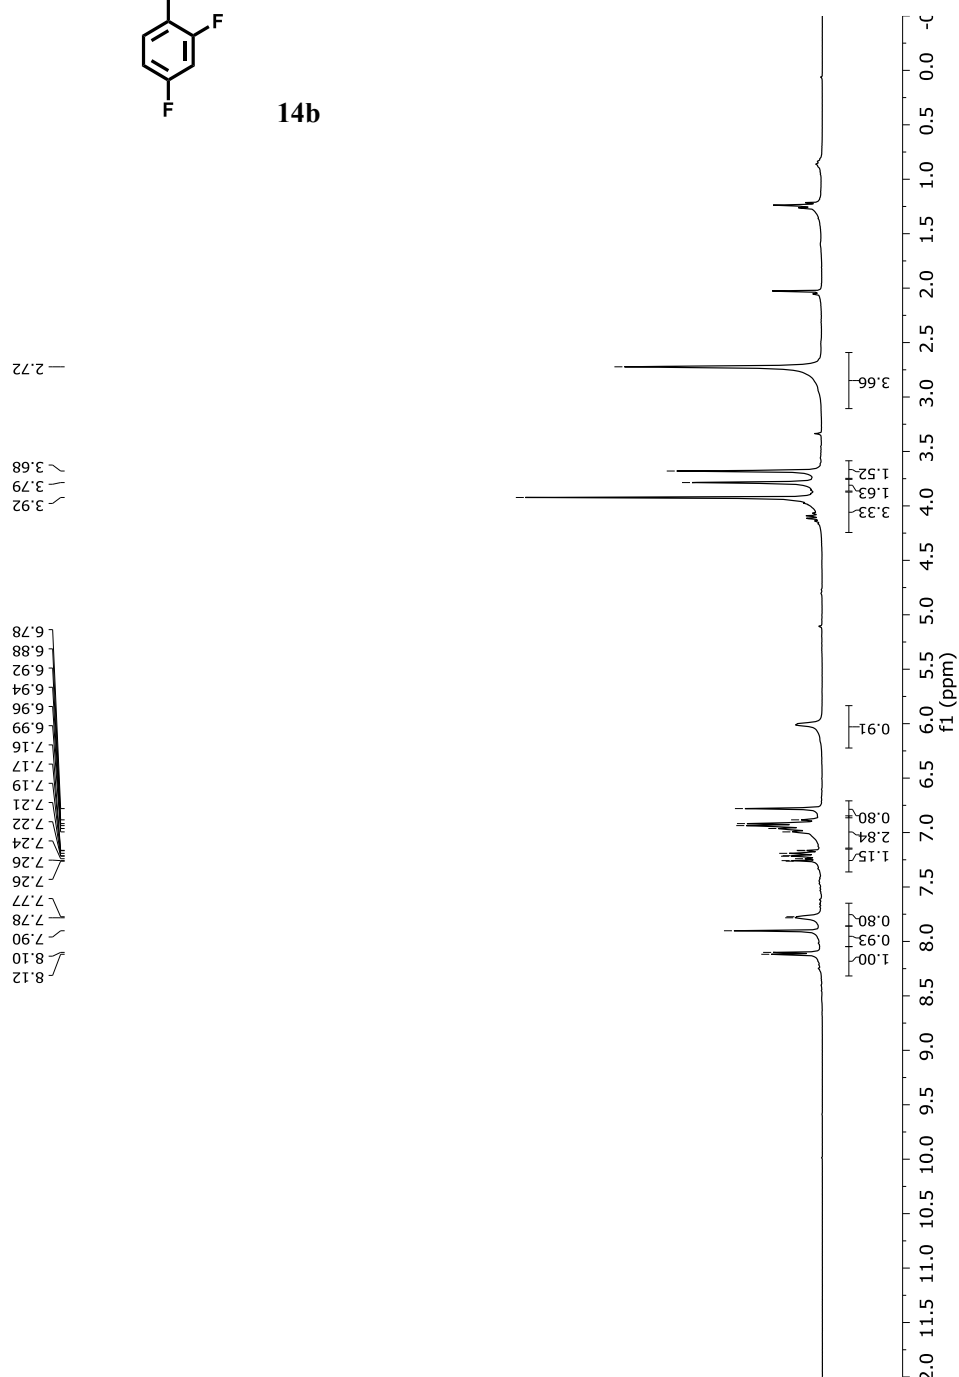

# <sup>13</sup>C spectrum of 14b

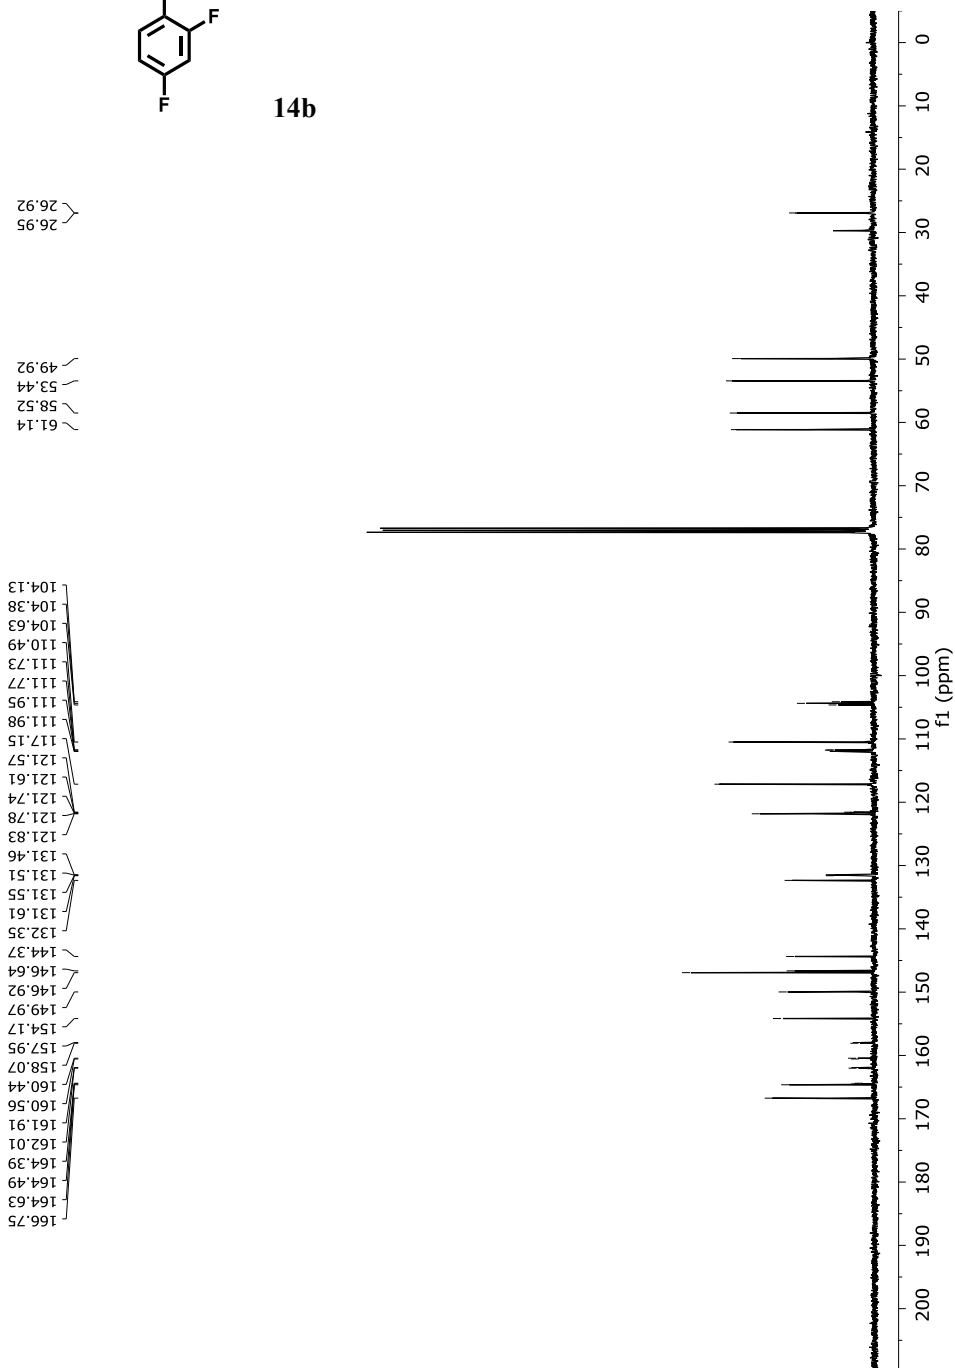

# <sup>1</sup>H spectrum of 14c

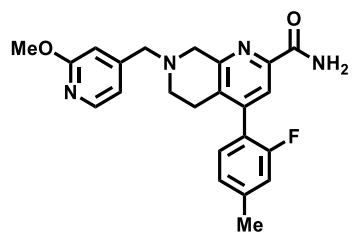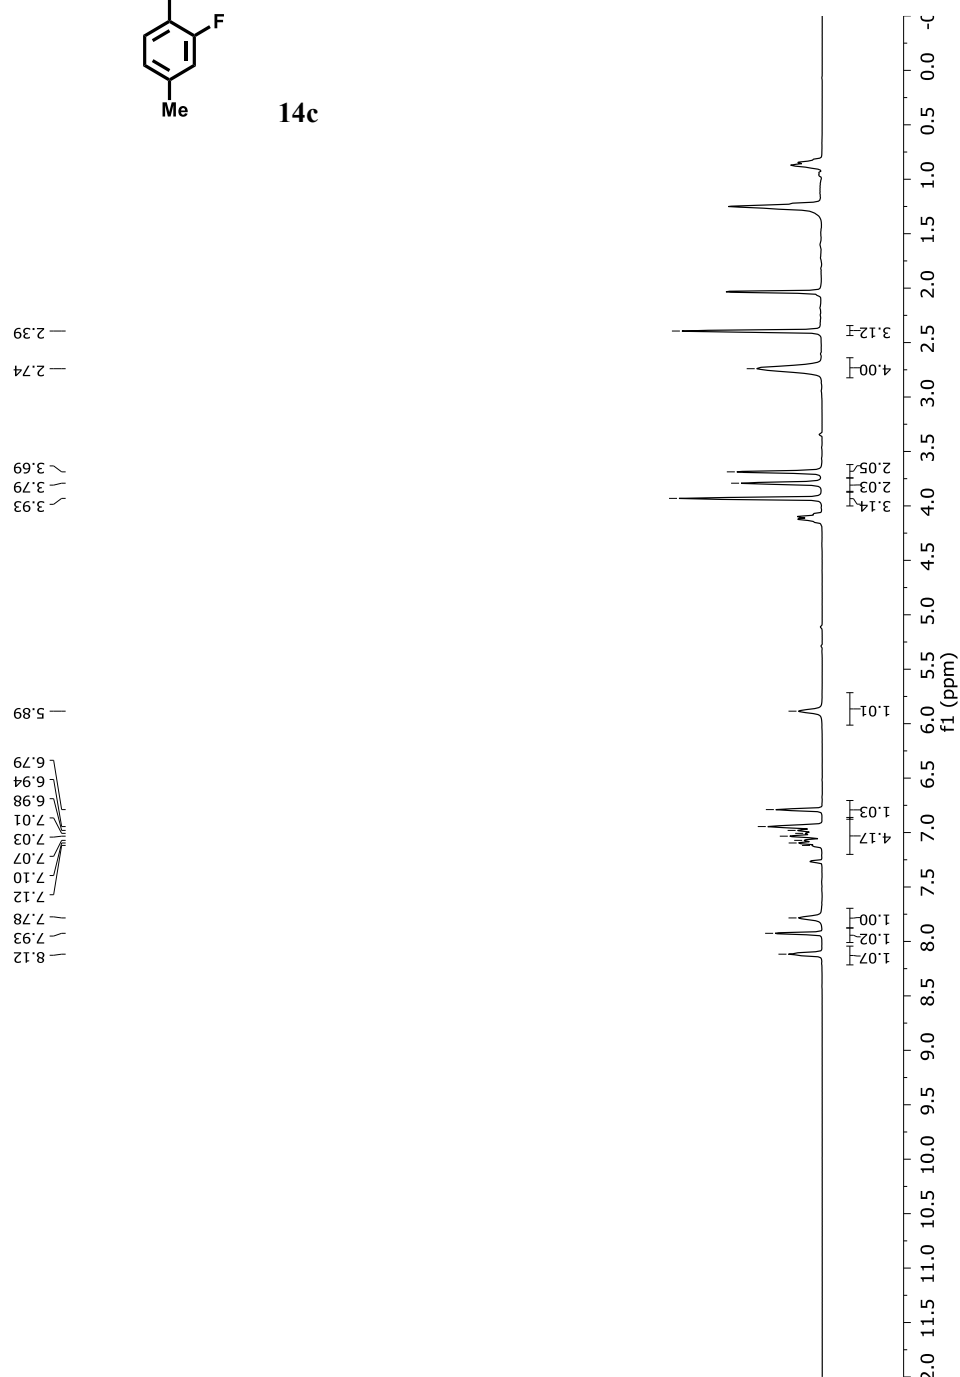



# <sup>13</sup>C spectrum of 14c

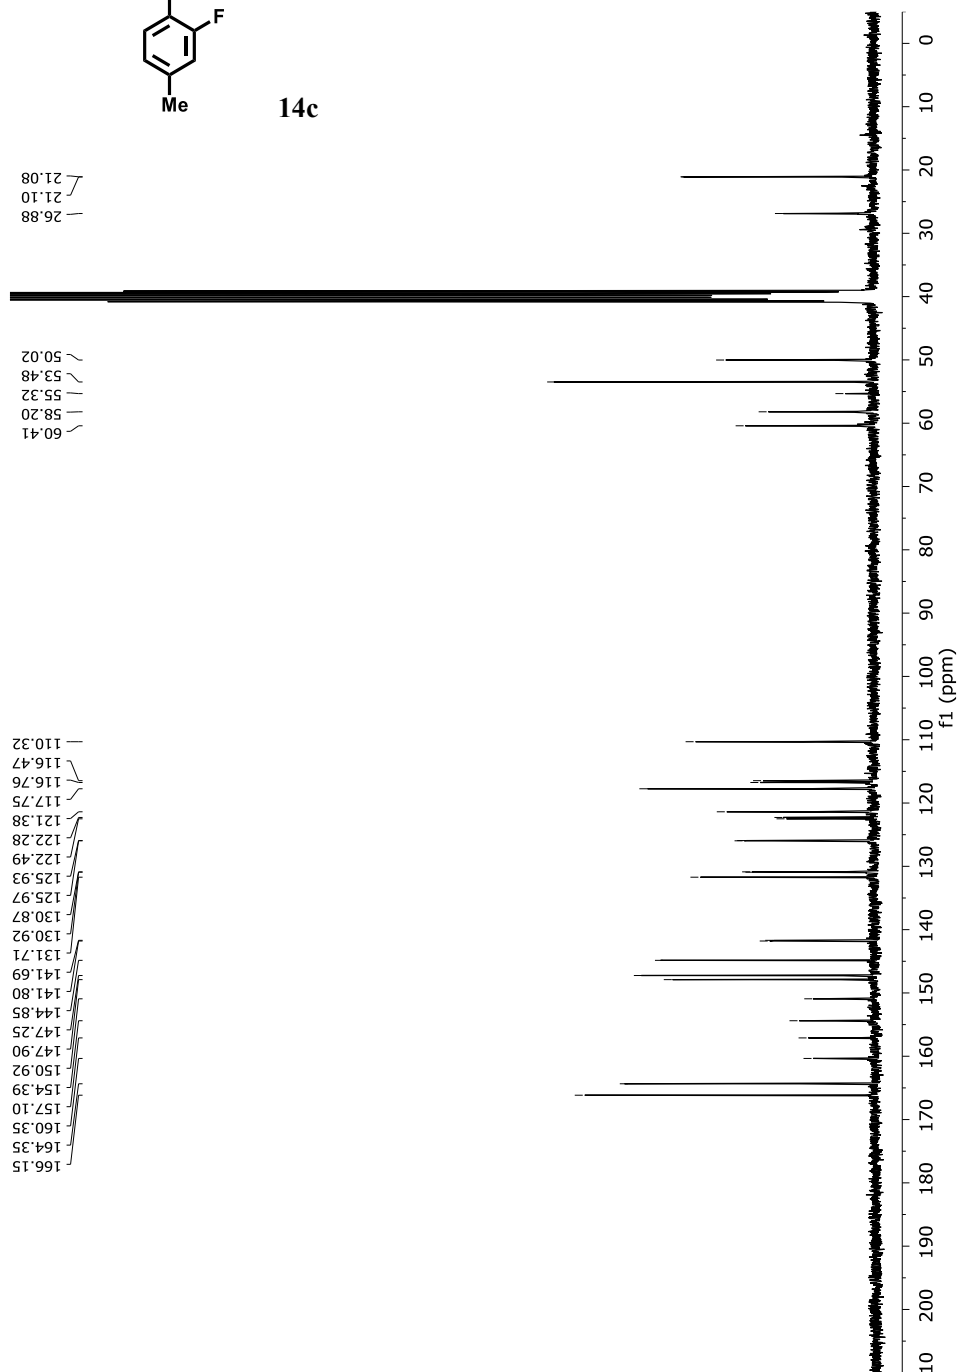

# <sup>1</sup>H spectrum of 14d

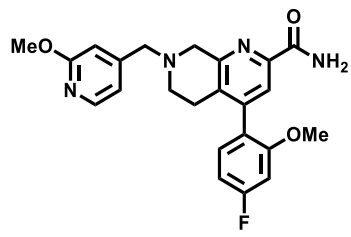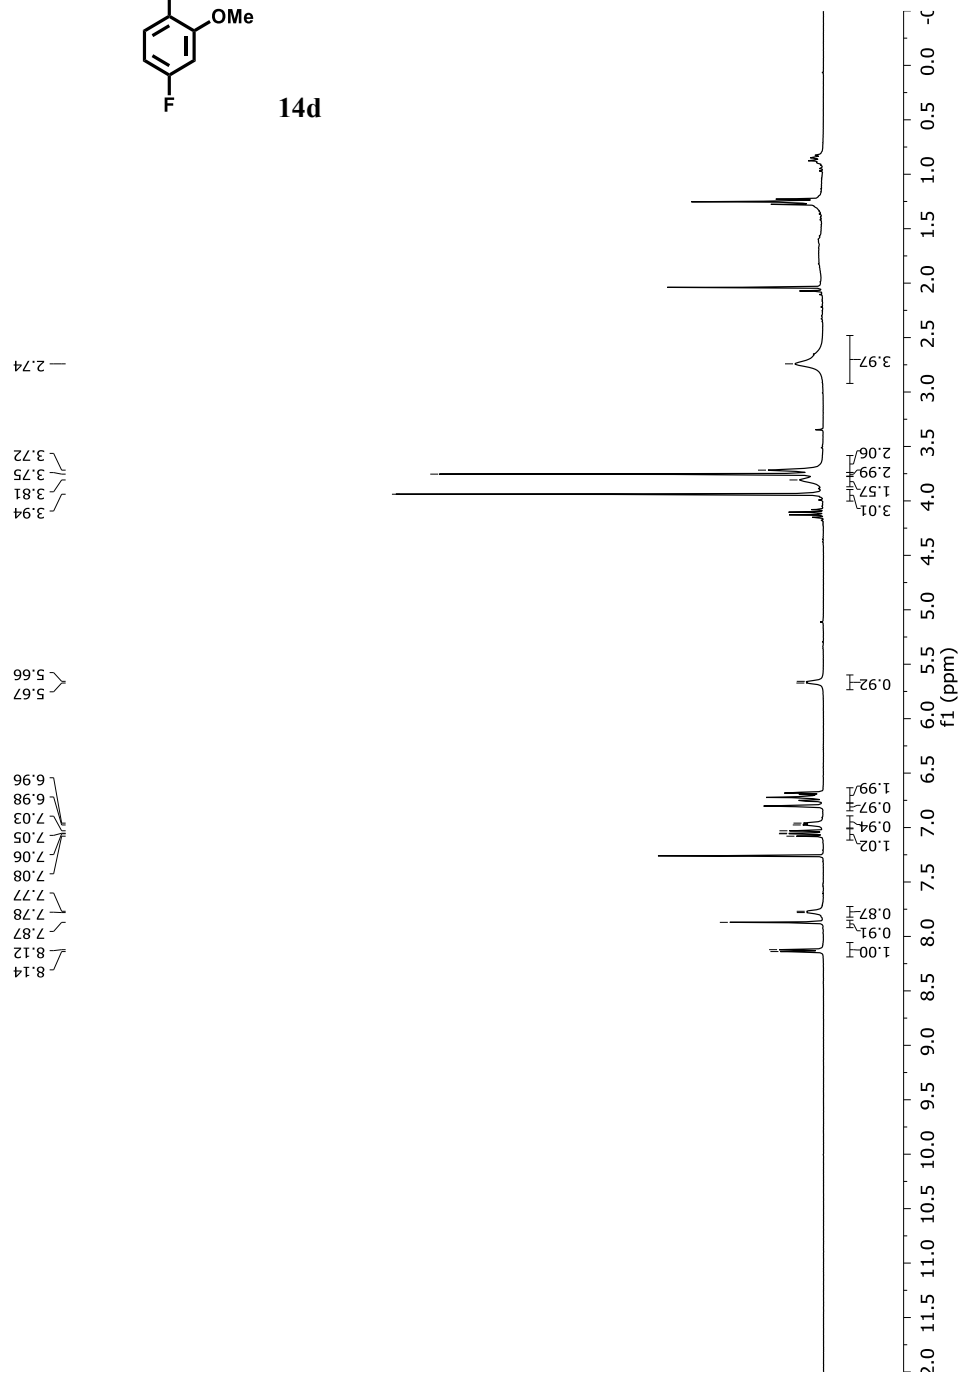

# <sup>13</sup>C spectrum of 14d

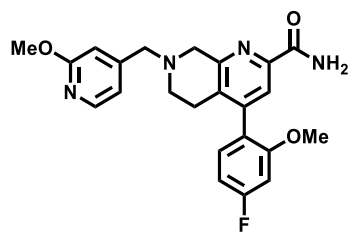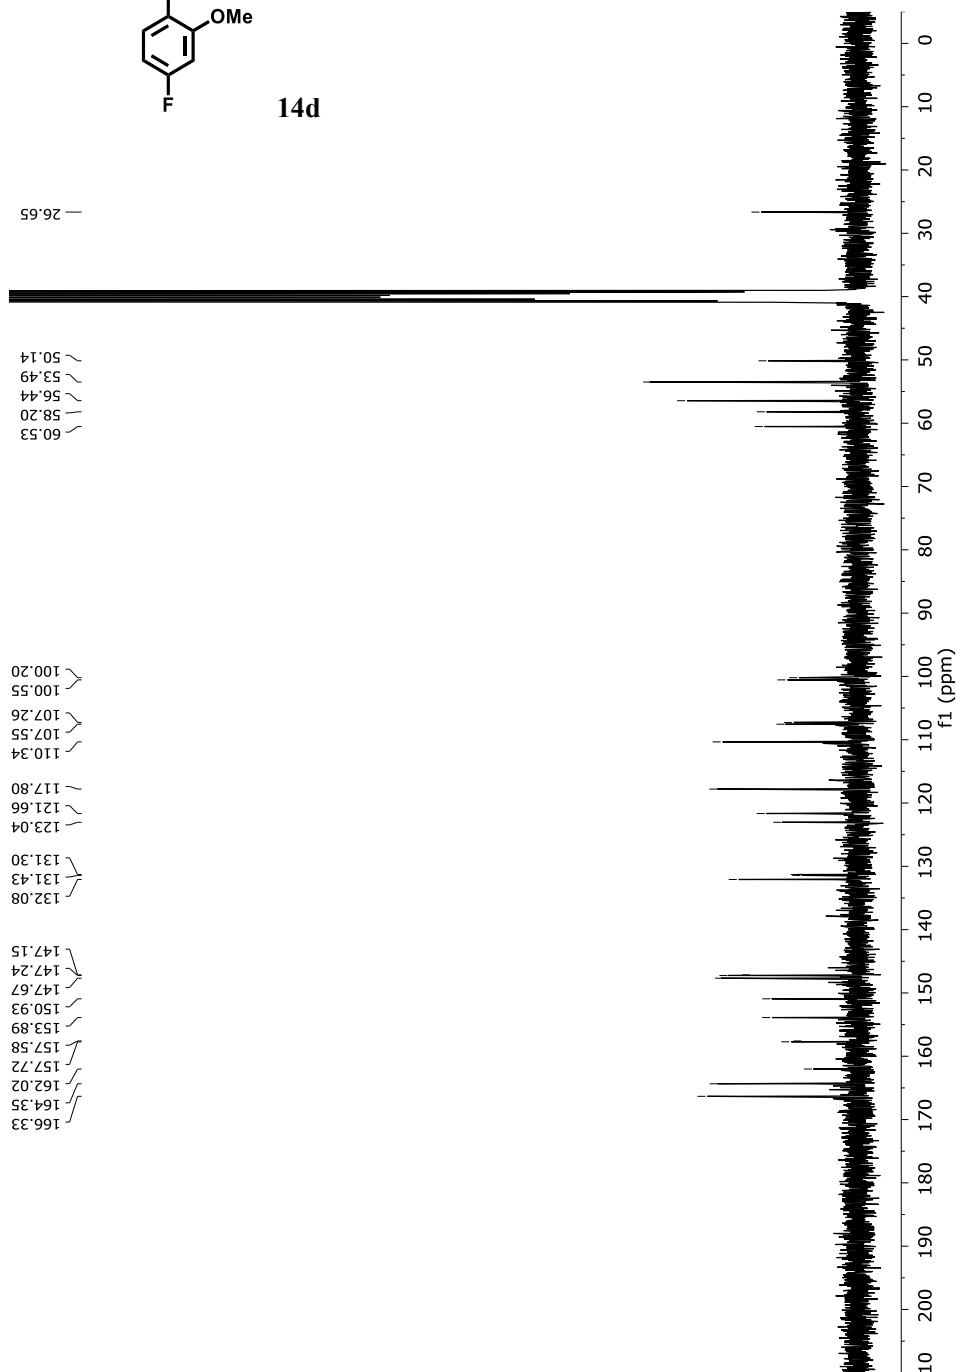

# <sup>1</sup>H spectrum of 14e

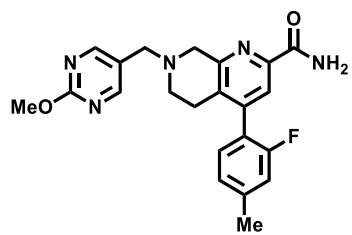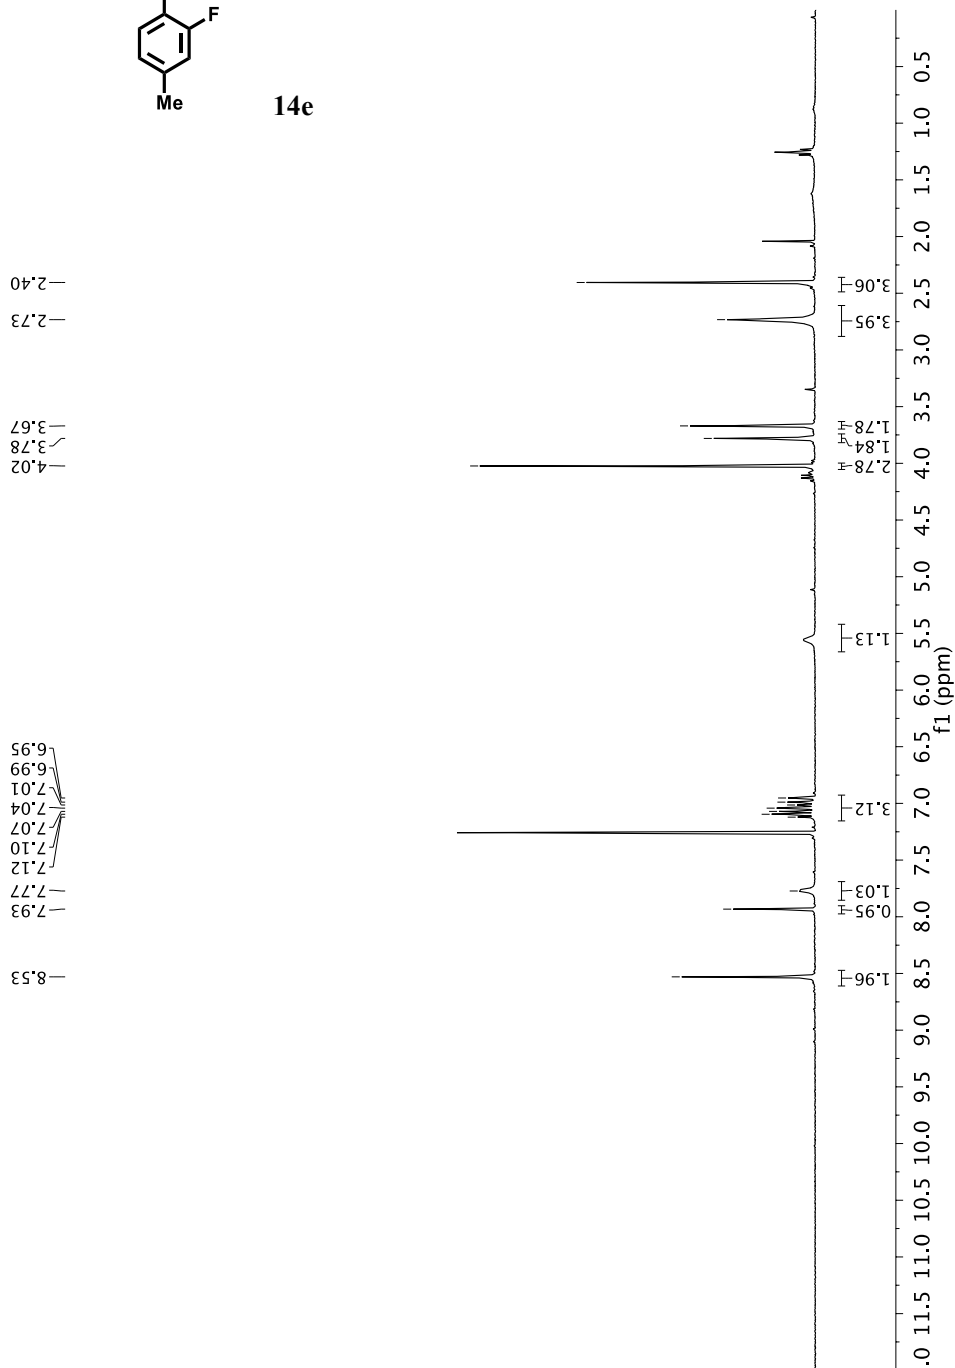

# <sup>13</sup>C spectrum of 14e

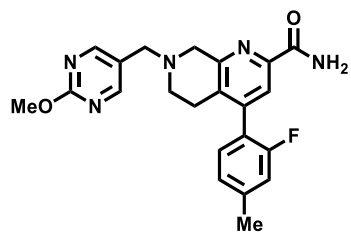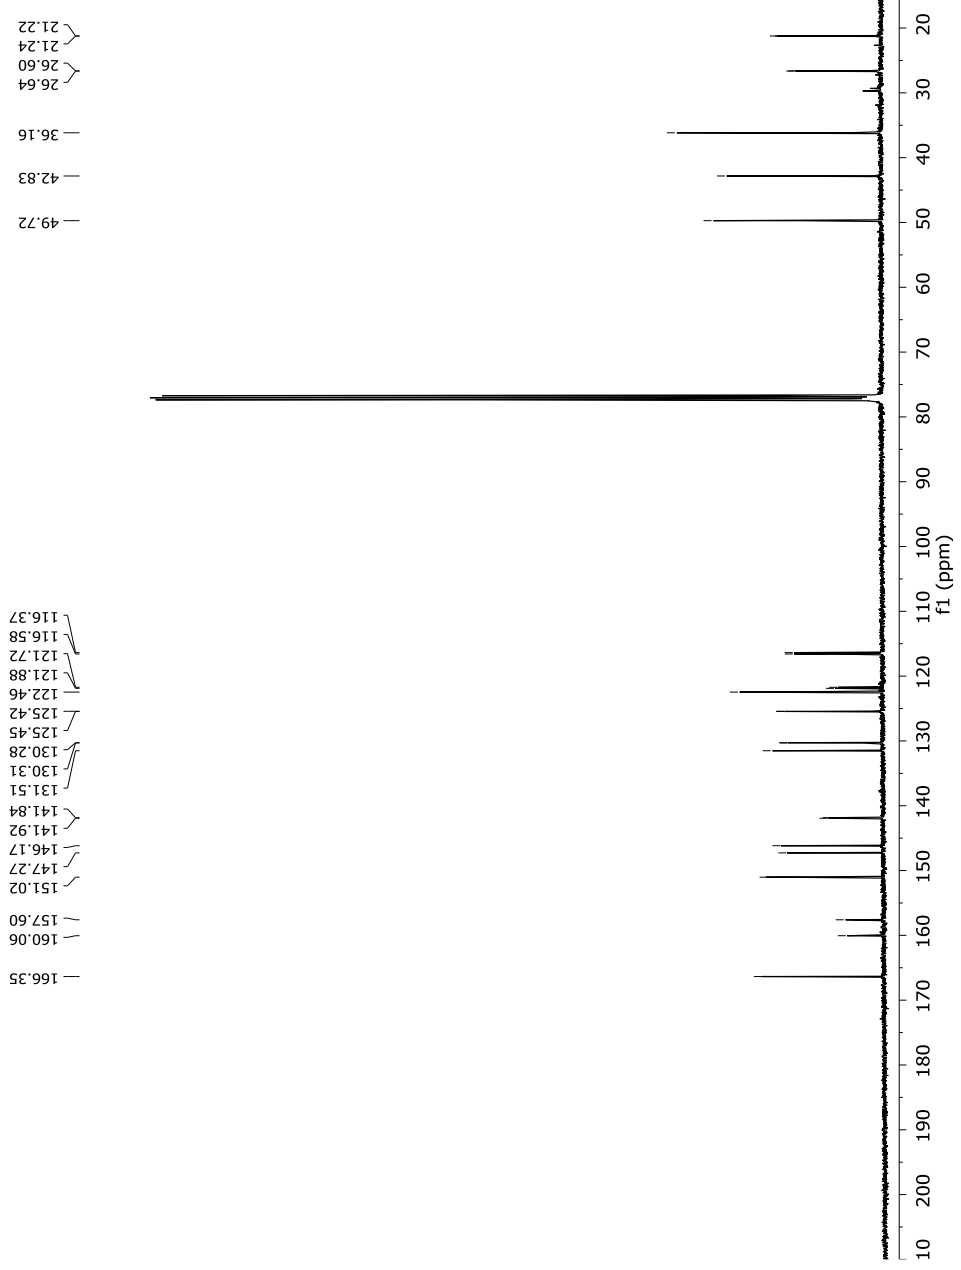

# <sup>1</sup>H spectrum of 14f

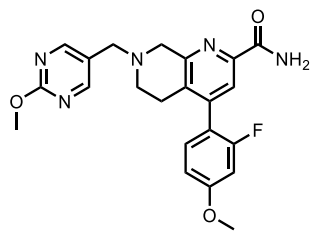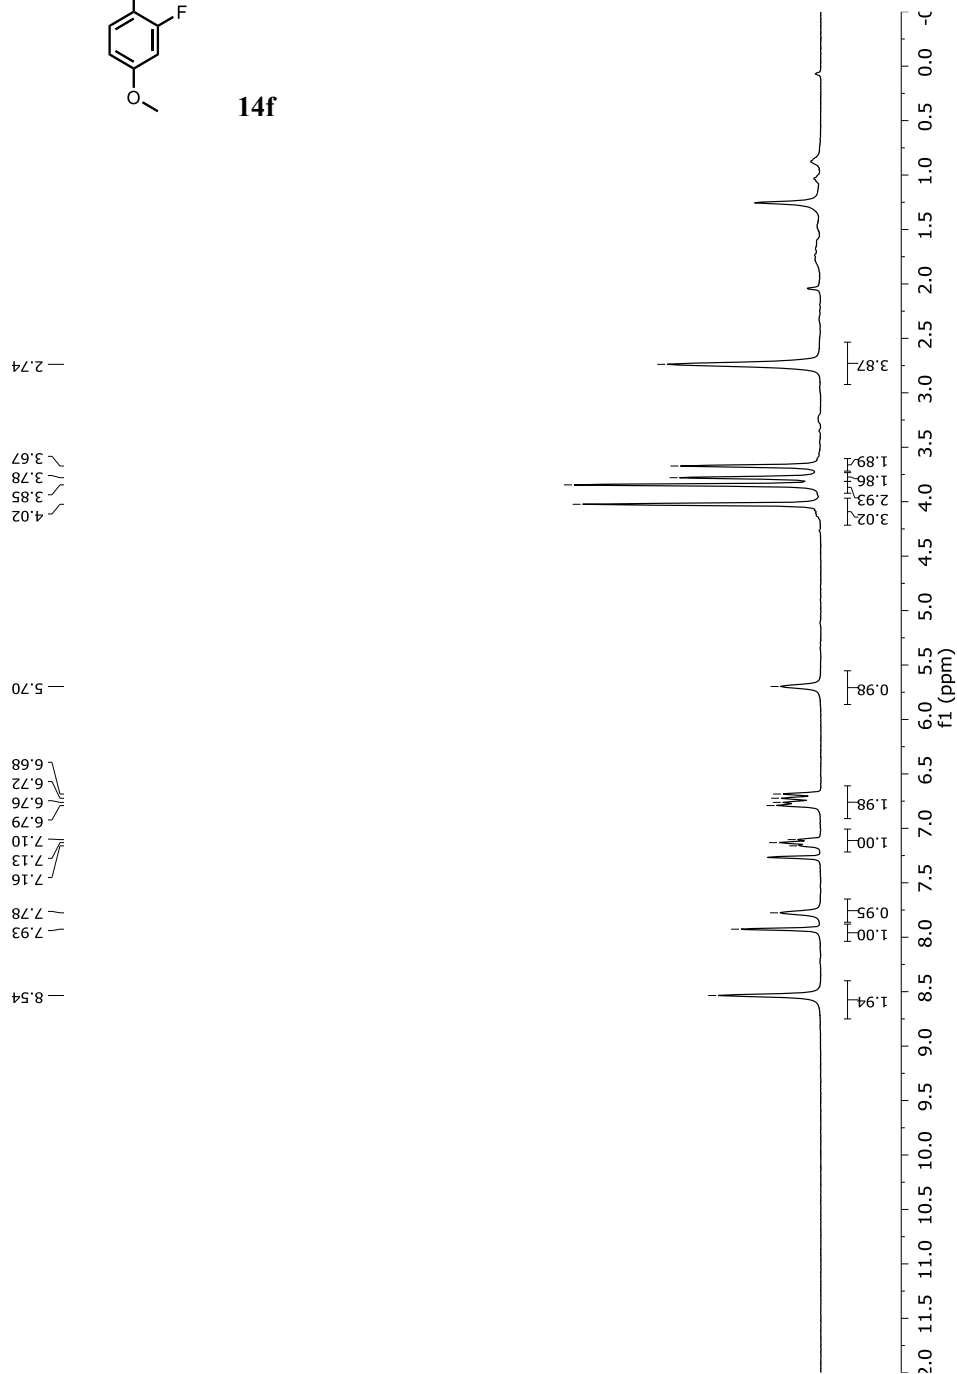

# <sup>13</sup>C spectrum of 14f

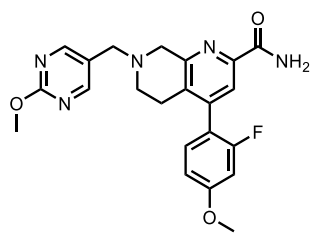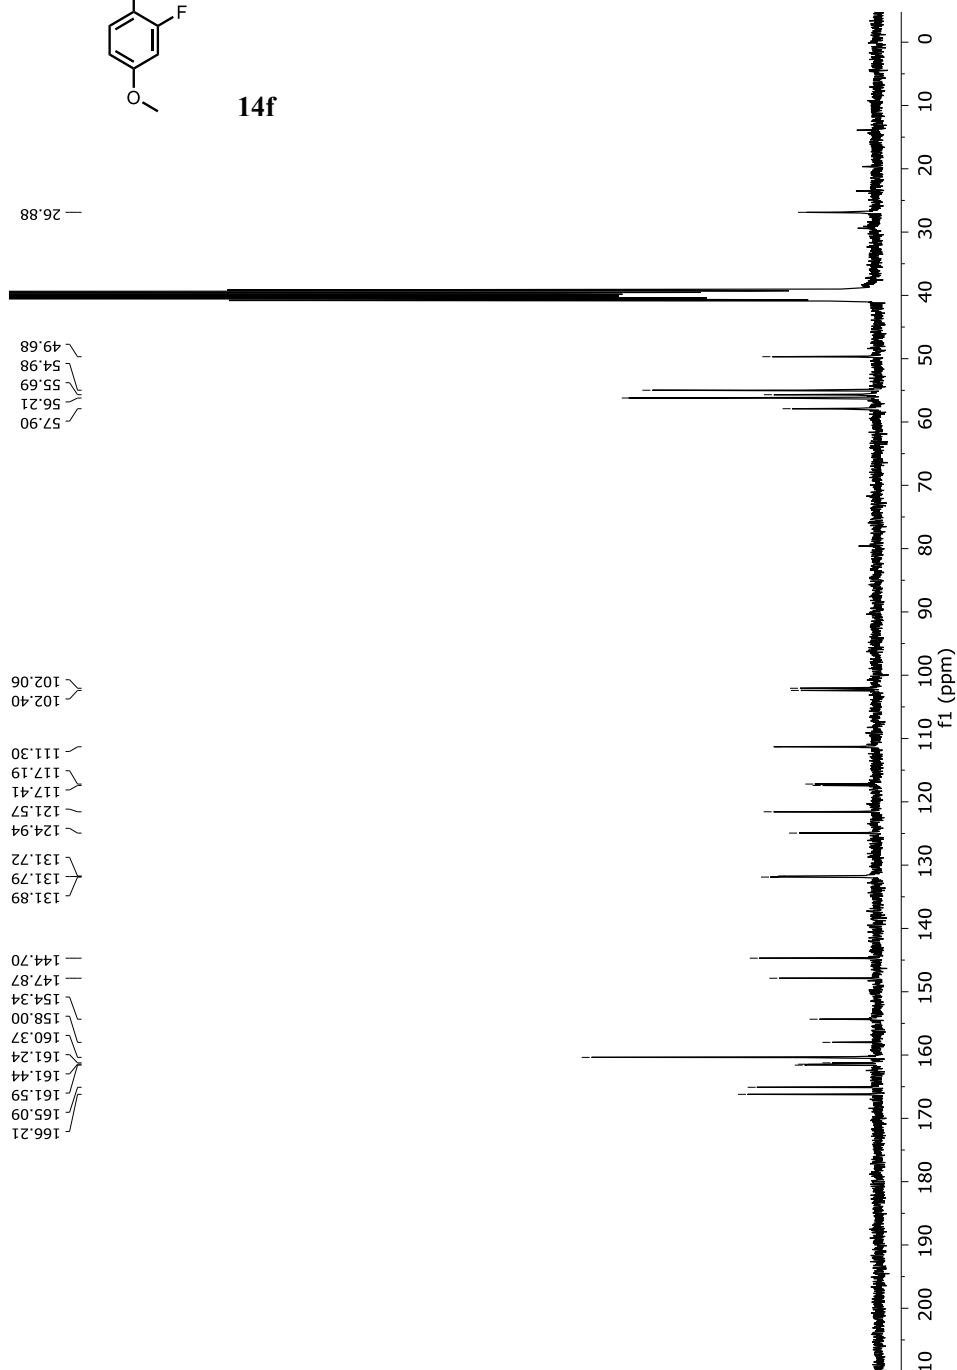

# <sup>1</sup>H spectrum of 14g

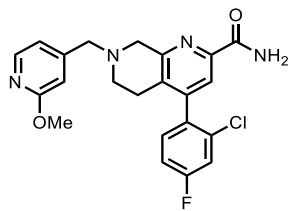

14g

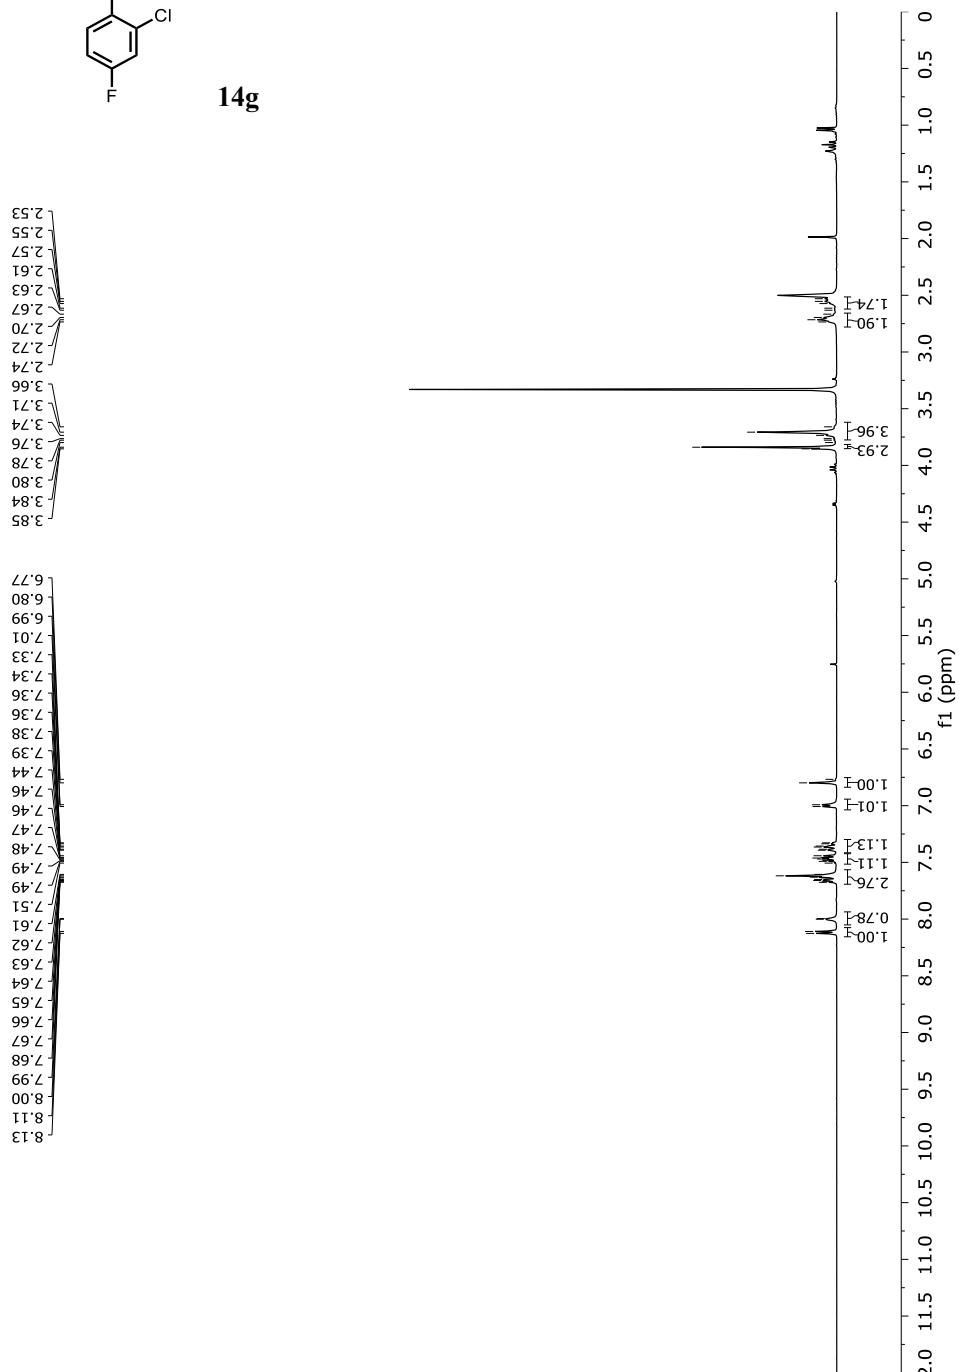



# <sup>13</sup>C spectrum of 14g

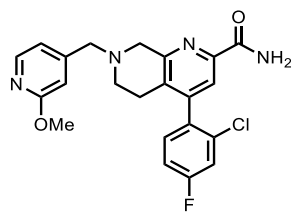

14g

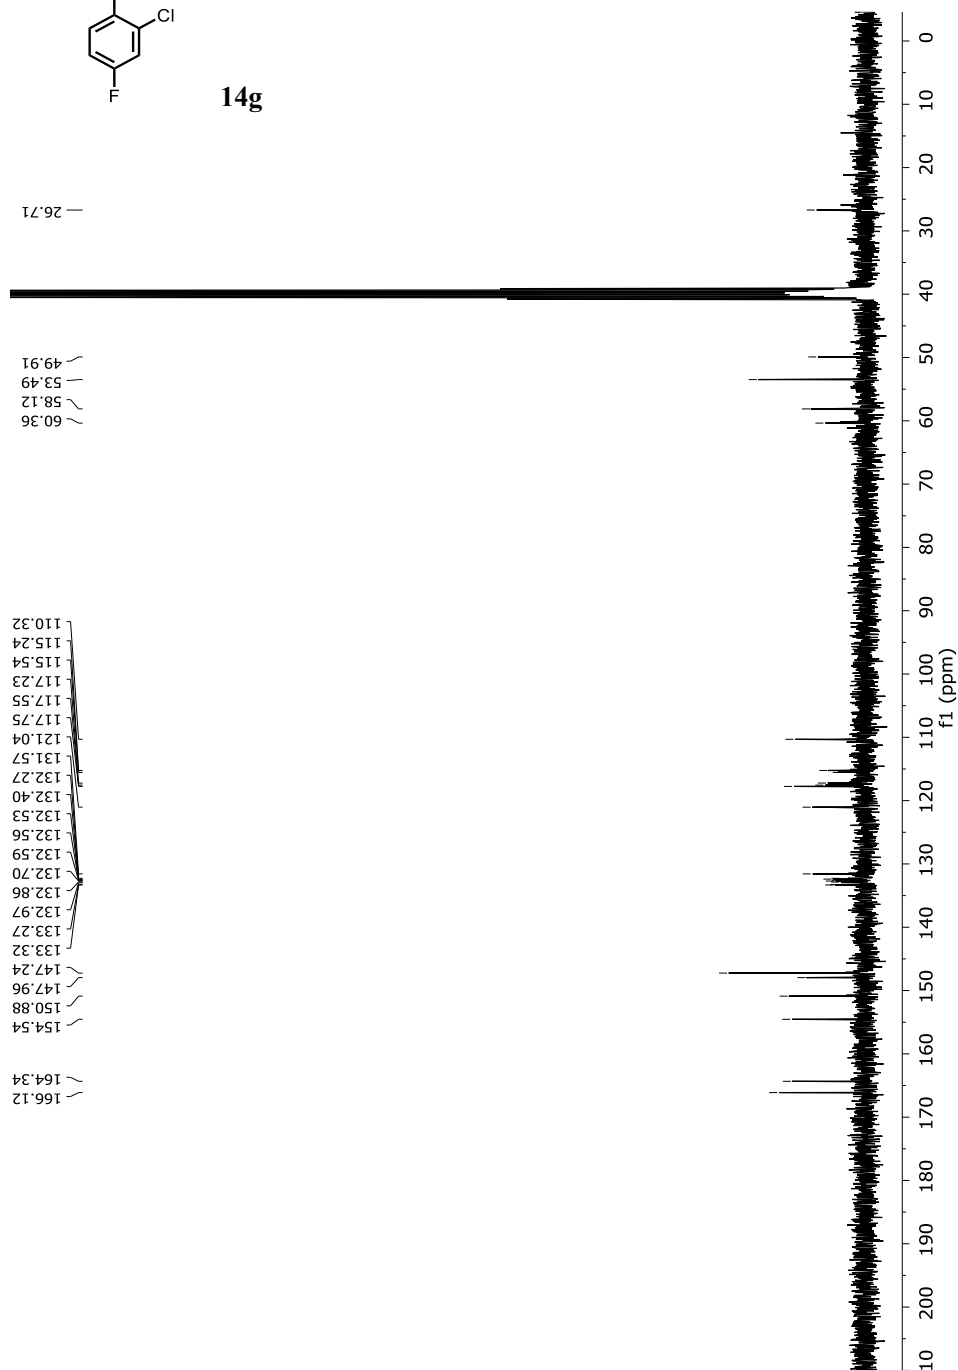

# <sup>1</sup>H spectrum of 16

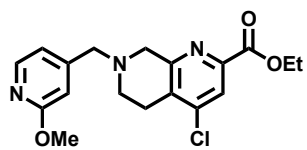

16

1.42  
1.40  
1.38

2.80  
2.82  
2.84  
2.95  
2.97  
2.99

3.69  
3.81  
3.93  
4.41  
4.43  
4.46  
4.48

6.75  
6.75  
6.75  
6.75  
6.89  
6.91

7.97  
8.09  
8.11

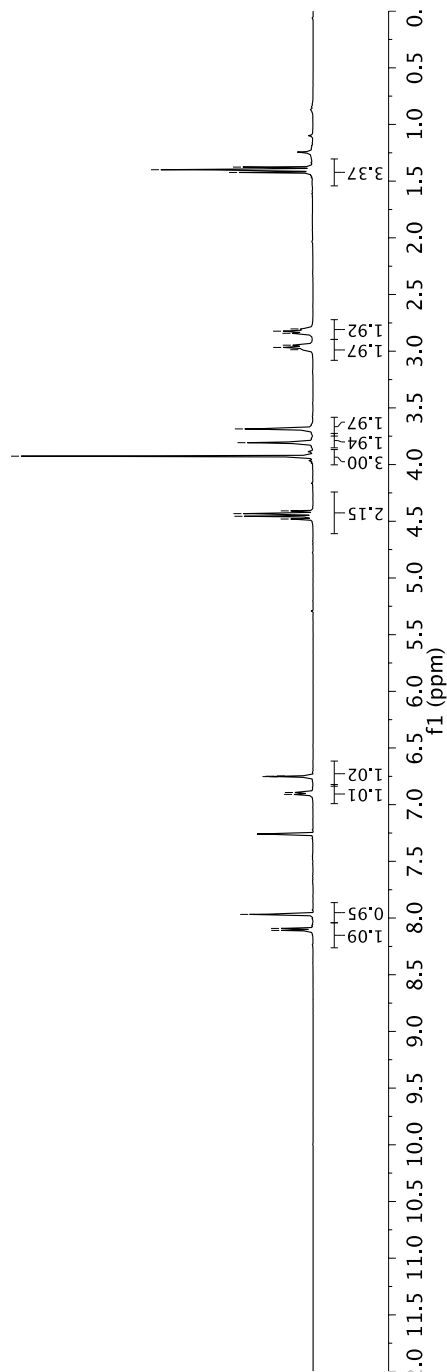

# <sup>13</sup>C spectrum of 16

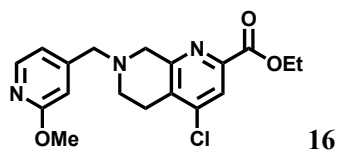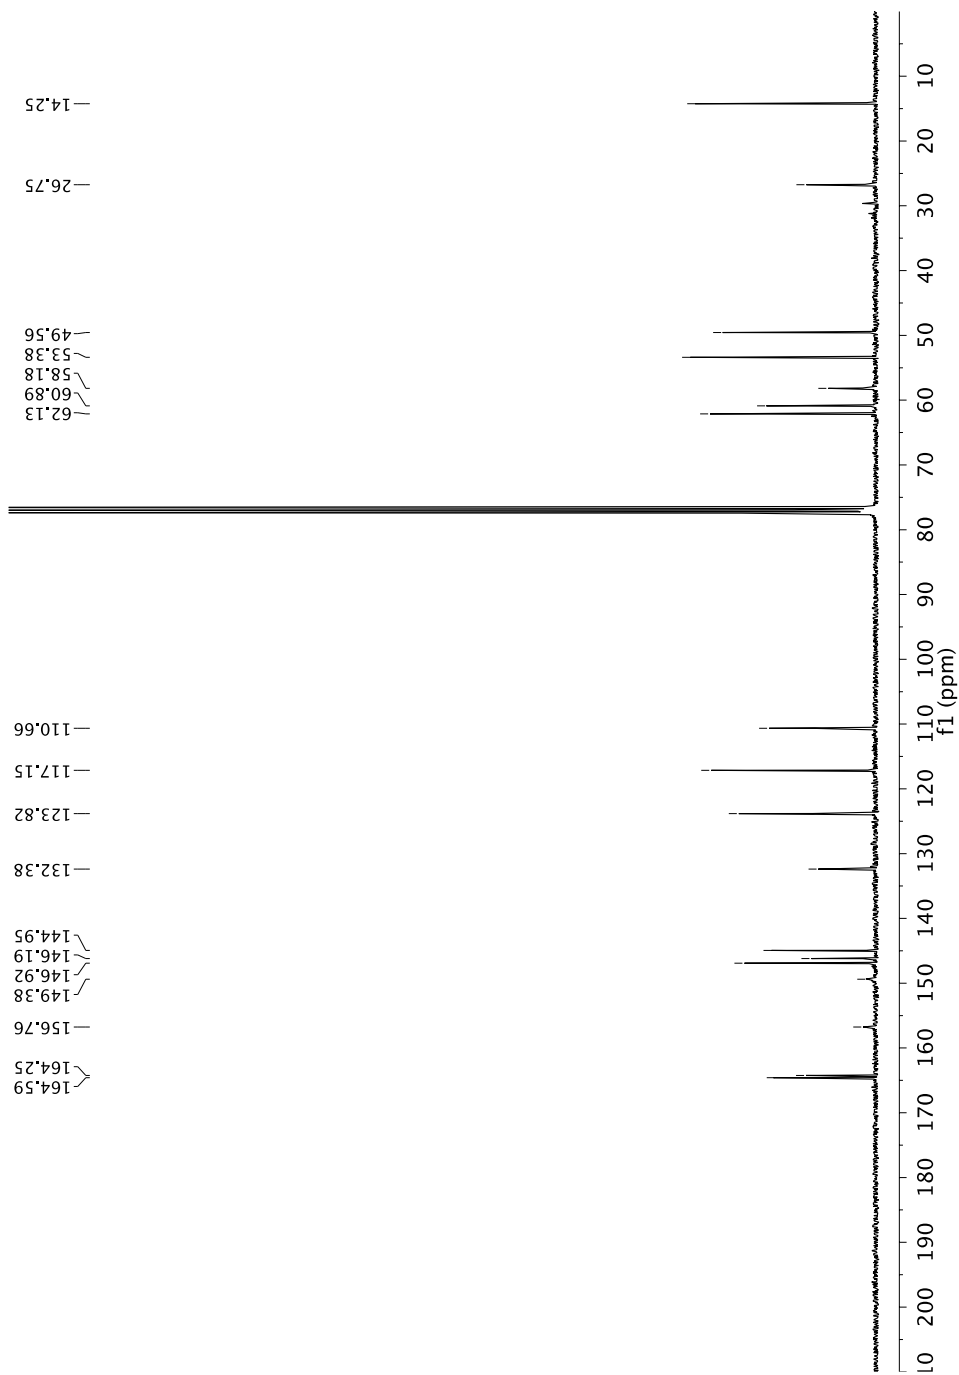

# <sup>1</sup>H spectrum of 17

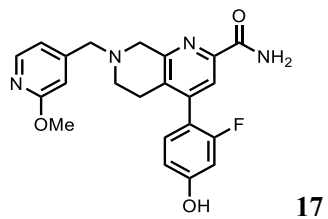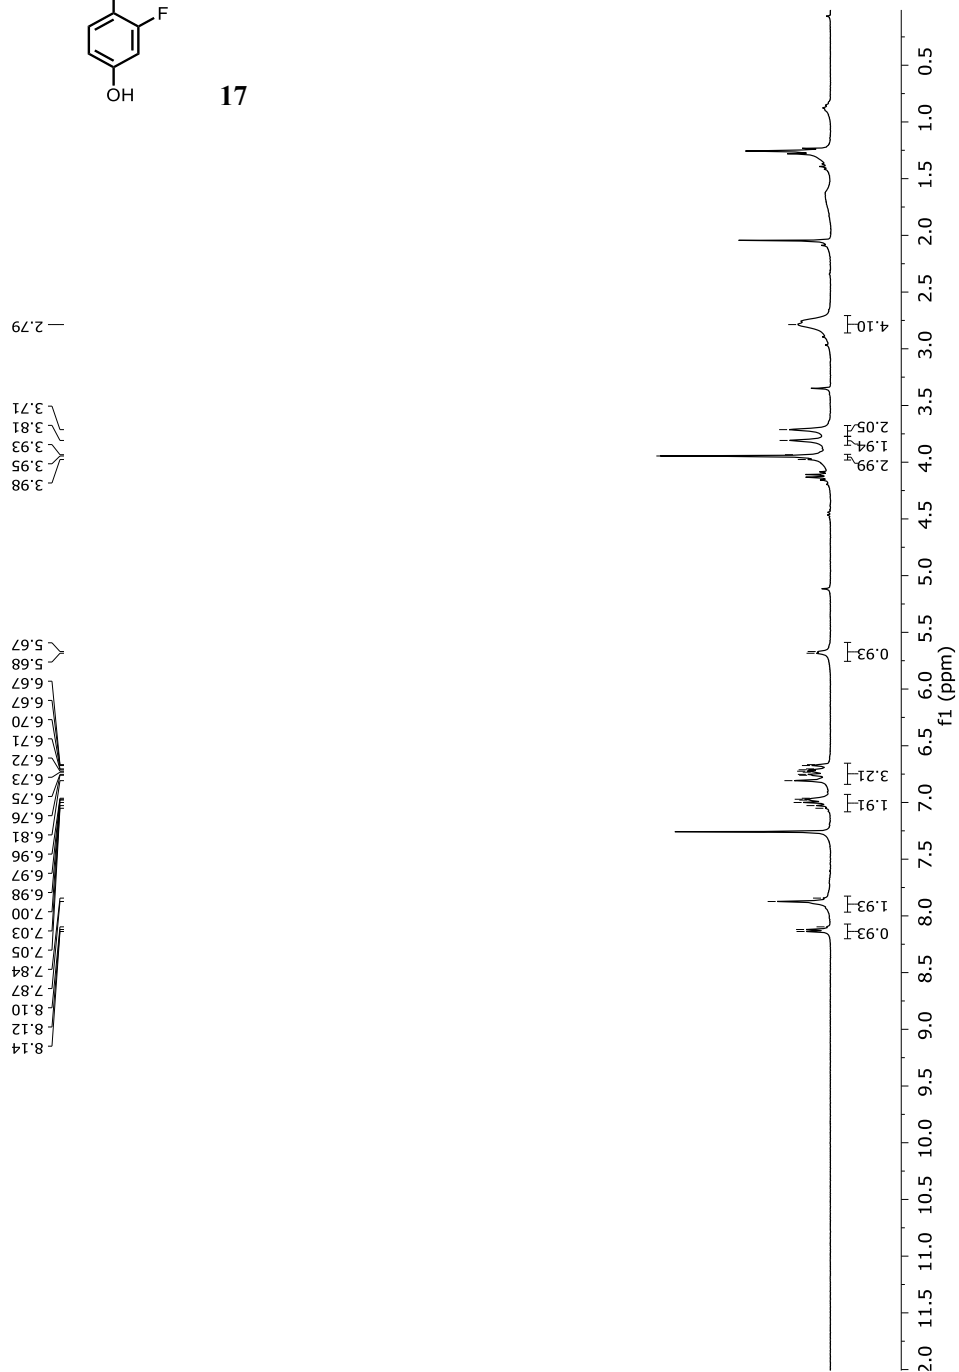

# <sup>13</sup>C spectrum of 17

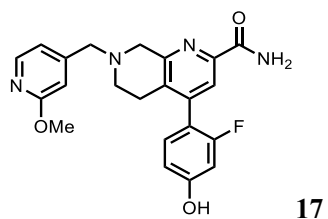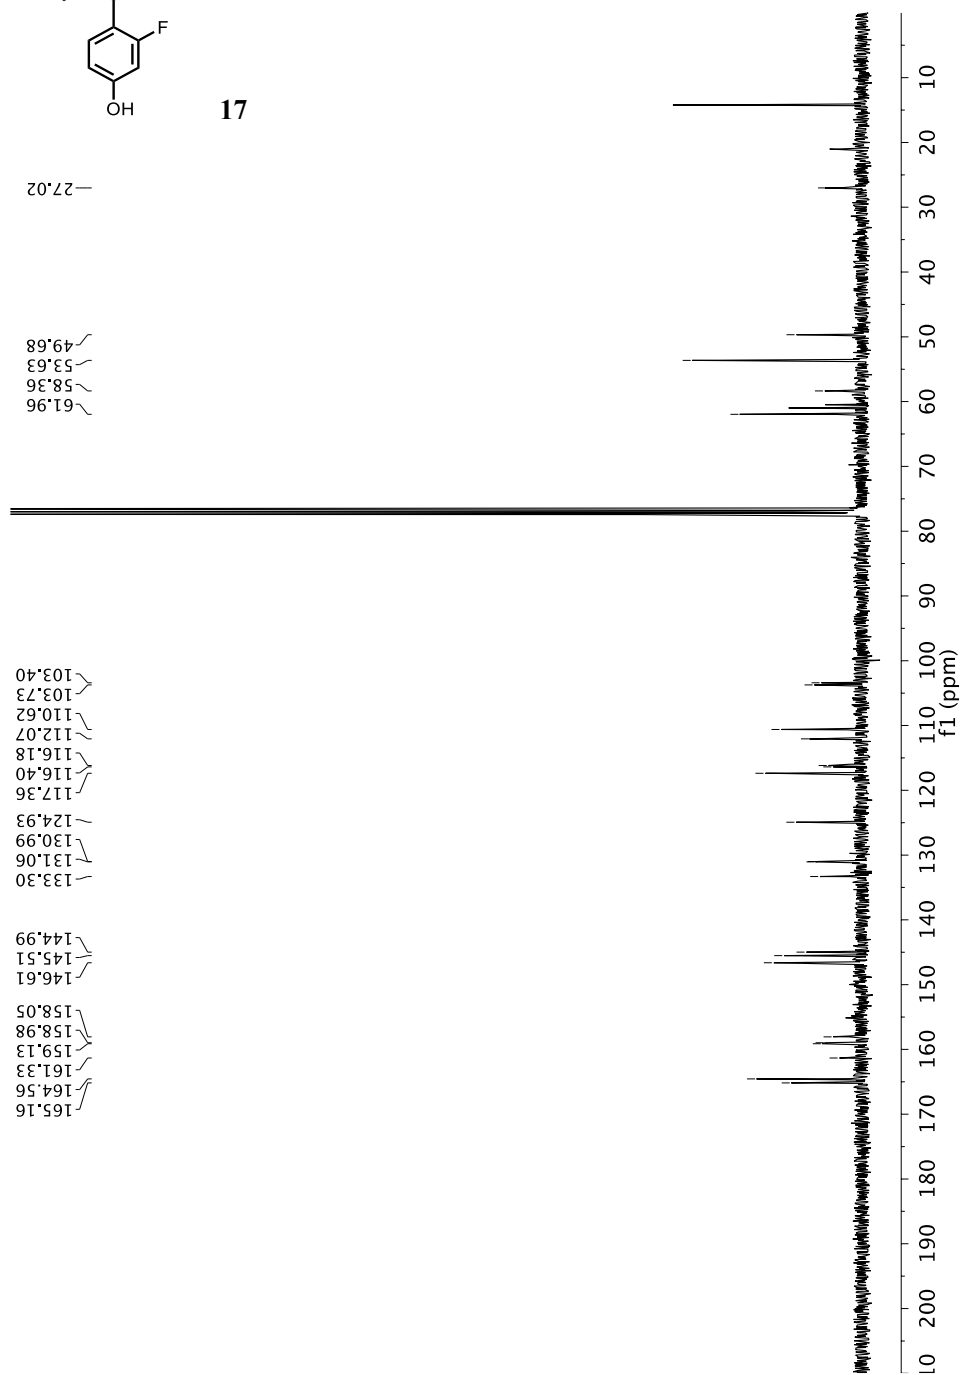

# <sup>1</sup>H spectrum of 18

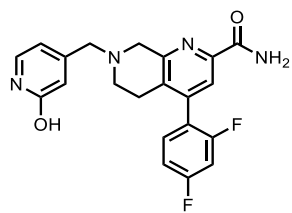

18

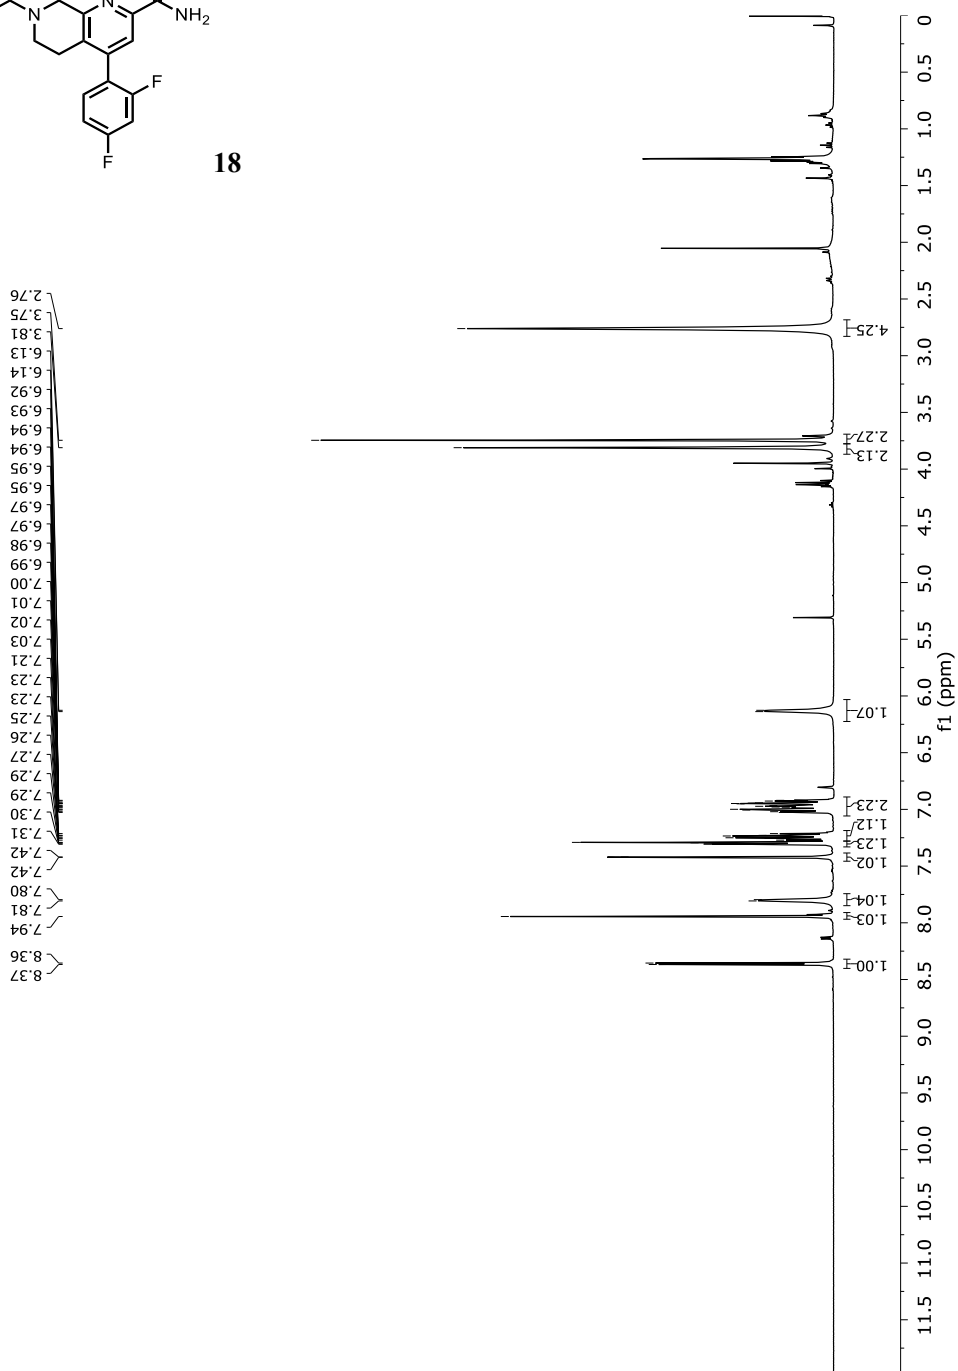

# <sup>13</sup>C spectrum of 18



18

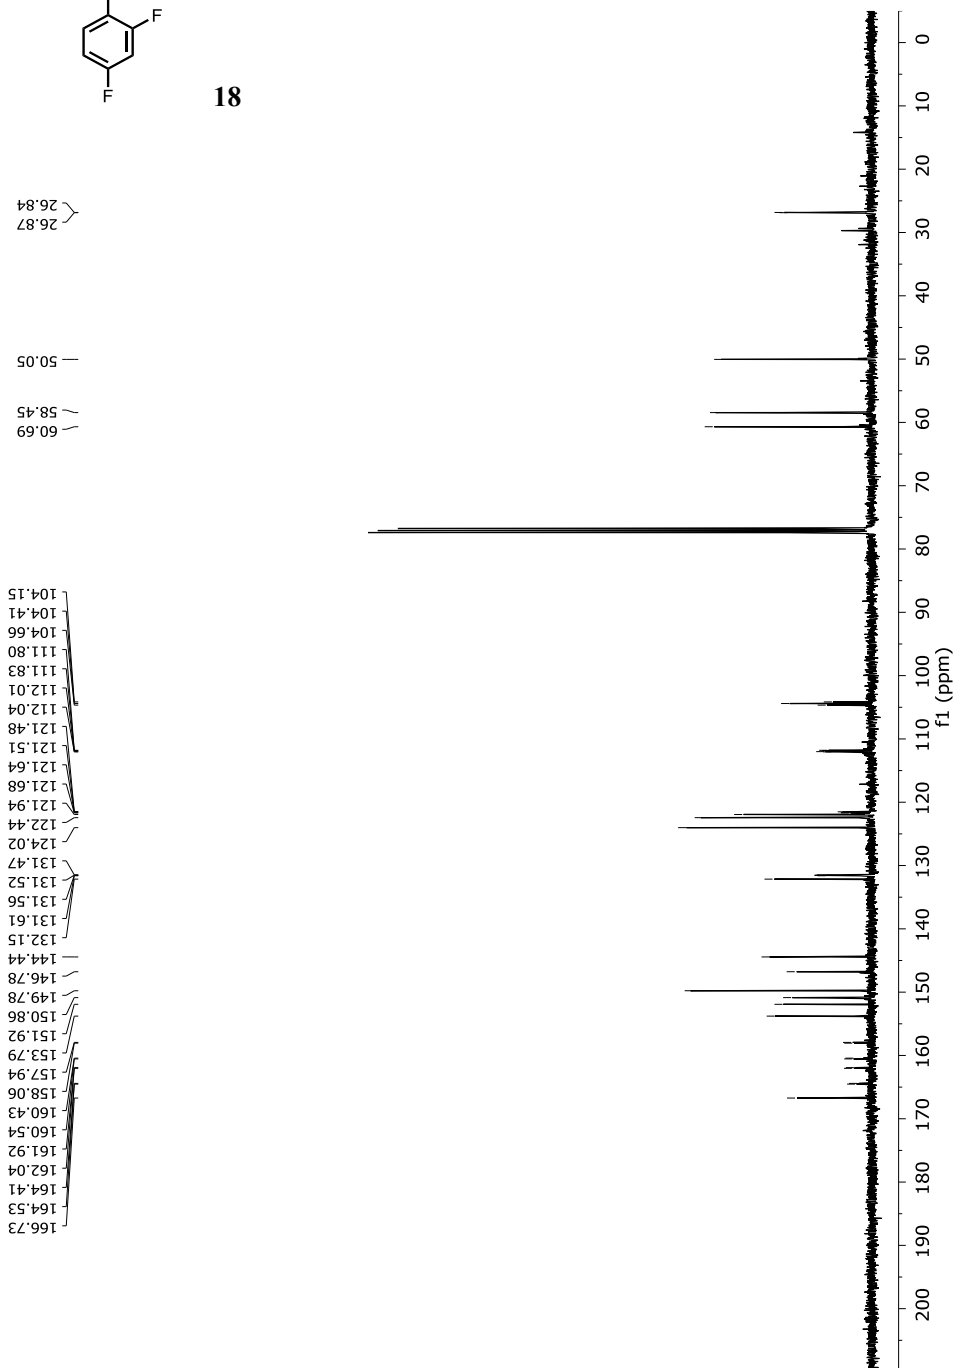

Supplement: thnov10p11178s1.pdf [file thnov10p11178s1.pdf]
